# Supplementary material for: Infection and coinfection by human papillomavirus, Epstein–Barr virus and Merkel cell polyomavirus in patients with squamous cell carcinoma of the larynx: a retrospective study
Source: PeerJ. 2018 Oct 24;6:e5834. doi: 10.7717/peerj.5834 (PMC6203941; doi:10.7717/peerj.5834)
Supplement: Supplemental Information 1 [file peerj-06-5834-s001.xlsx]

## Sheet: Complete Data
Patient No.	Sex	Age	Surgical Sample	Anatomical Location	Histopathological SCC Grading	Histopathological SCC Grading	Smoking	Alcohol use	HPV Infection	HPV Genotype	Multiple HPV infection	HPV High Risk Detection	EBV Infection	MCPV Infection
1	M	89	Laryngectomy	Glottic	Poorly Differentiated, No keratinized	PDNK	Yes	Yes	-				+	-
2	M	61	Biopsy	Glottic	Moderately Differentiated, Some keratinized	MDSK	Yes	No	-				-	-
3	M	74	Biopsy	Supraglottic	Moderately Differentiated, Some keratinized	MDSK	Yes	No	-				-	-
4	M	81	Biopsy	Glottic	Moderately Differentiated, Some keratinized	MDSK	Yes	No	-				+	-
5	M	61	Laryngectomy	Subglottic	Moderately Differentiated, Some keratinized	MDSK	Yes	Yes	-				-	+
6	M	45	Biopsy	Glottic	Moderately Differentiated, Some keratinized	MDSK	Yes	No	-				-	-
7	M	61	Laryngectomy	Subglottic	Moderately Differentiated, Some keratinized	MDSK	Yes	Yes	+	11, 52	+	+	-	-
8	M	75	Biopsy	Glottic	Moderately Differentiated, Some keratinized	MDSK	Yes	No	+	52		+	-	-
9	M	53	Laryngectomy	Transglottic	Moderately Differentiated, Some keratinized	MDSK	Yes	No	+	16		+	-	-
10	M	61	Biopsy	Glottic	Moderately Differentiated, Some keratinized	MDSK	Yes	No	+	52		+	-	-
11	M	56	Laryngectomy	Transglottic	Moderately Differentiated, Some keratinized	MDSK	Yes	No	-				-	-
12	M	66	Biopsy	Glottic	Moderately Differentiated, Some keratinized	MDSK	Yes	No	-				+	-
13	M	61	Biopsy	Supraglottic	Moderately Differentiated, Some keratinized	MDSK	Yes	No	+	52		+	-	-
14	M	51	Biopsy	Glottic	Highly Differentiated Invasive	HDI	Yes	No	-				-	-
15	M	63	Biopsy	Glottic	Moderately Differentiated, Some keratinized	MDSK	Yes	No	+	16		+	-	+
16	M	58	Biopsy	Glottic	Moderately Differentiated, Some keratinized	MDSK	Yes	No	-				+	-
17	F	60	Biopsy	Glottic	Poorly Differentiated, No keratinized	PDNK	Yes	No	-				-	-
18	M	40	Laryngectomy	Transglottic	Moderately Differentiated, Some keratinized	MDSK	Yes	No	-				+	-
19	M	60	Laryngectomy	Transglottic	Moderately Differentiated, Some keratinized	MDSK	Yes	No	-				-	-
20	M	85	Biopsy	Supraglottic	Moderately Differentiated, Some keratinized	MDSK	Yes	No	-				+	-
21	M	61	Laryngectomy	Transglottic	Moderately Differentiated, Some keratinized	MDSK	Yes	No	-				+	-
22	M	66	Biopsy	Glottic	Moderately Differentiated, Some keratinized	MDSK	Yes	No	-				-	-
23	M	61	Biopsy	Supraglottic	Moderately Differentiated, Non- Keratinized	MDNK	Yes	No	-				+	-
24	M	65	Biopsy	Glottic	Highly Differentiated Invasive	HDI	Yes	No	-				-	-
25	M	63	Biopsy	Glottic	Moderately Differentiated, Some keratinized	MDSK	Yes	No	-				-	-
26	M	56	Laryngectomy	Transglottic	Moderately Differentiated, Some keratinized	MDSK	Yes	No	-				-	-
27	M	82	Biopsy	Glottic	Highly Differentiated Invasive	HDI	Yes	No	-				-	-
28	M	71	Laryngectomy	Transglottic	Moderately Differentiated, Some keratinized	MDSK	Yes	No	+	11, 52	+	+	-	-
29	M	68	Biopsy	Supraglottic	Moderately Differentiated, Some keratinized	MDSK	Yes	No	+	11, 16	+	+	-	-
30	M	78	Biopsy	Glottic	Moderately Differentiated, Some keratinized	MDSK	Yes	No	-				-	-
31	M	65	Biopsy	Glottic	Moderately Differentiated, Some keratinized	MDSK	Yes	No	-				-	-
32	M	69	Biopsy	Glottic	Moderately Differentiated, Some keratinized	MDSK	Yes	No	+	45		+	-	+
33	M	87	Biopsy	Glottic	Moderately Differentiated, Some keratinized	MDSK	Yes	No	-				-	-
34	M	71	Biopsy	Glottic	Moderately Differentiated, Some keratinized	MDSK	Yes	No	-				-	-
35	M	61	Laryngectomy	Subglottic	Moderately Differentiated, Some keratinized	MDSK	Yes	Yes	-				-	-
36	F	64	Biopsy	Glottic	Moderately Differentiated, Some keratinized	MDSK	Yes	No	-				-	-
37	M	60	Laryngectomy	Transglottic	Moderately Differentiated, Some keratinized	MDSK	Yes	No	-				-	-
38	M	60	Laryngectomy	Transglottic	Moderately Differentiated, Some keratinized	MDSK	Yes	No	-				+	-
39	M	76	Biopsy	Glottic	Highly Differentiated Invasive	HDI	Yes	No	-				-	-
40	M	76	Biopsy	Supraglottic	Moderately Differentiated, Some keratinized	MDSK	Yes	No	-				-	-
41	M	60	Laryngectomy	Transglottic	Moderately Differentiated, Some keratinized	MDSK	Yes	No	-				+	-
42	M	79	Biopsy	Supraglottic	Moderately Differentiated, Some keratinized	MDSK	Yes	No	+	11		-	-	-
43	M	70	Biopsy	Glottic	Moderately Differentiated, Some keratinized	MDSK	Yes	No	-				-	-
44	M	56	Laryngectomy	Transglottic	Moderately Differentiated, Some keratinized	MDSK	Yes	Yes	-				-	-
45	M	81	Biopsy	Glottic	Moderately Differentiated, Some keratinized	MDSK	Yes	No	+	11, 52	+	+	-	+
46	M	67	Biopsy	Glottic	Moderately Differentiated, Some keratinized	MDSK	Yes	No	+	11, 16	+	+	-	-
47	M	71	Laryngectomy	Transglottic	Moderately Differentiated, Some keratinized	MDSK	Yes	No	+	6, 11, 52	+	+	-	-
48	M	80	Biopsy	Supraglottic	Moderately Differentiated, Some keratinized	MDSK	Yes	No	+	6, 11	+	-	-	-
49	M	63	Laryngectomy	Transglottic	Moderately Differentiated, Some keratinized	MDSK	Yes	No	+	11, 52	+	+	-	-
50	M	68	Laryngectomy	Glottic	Moderately Differentiated, Some keratinized	MDSK	No	Yes	+	11, 45, 52	+	+	-	-
51	M	83	Biopsy	Supraglottic	Moderately Differentiated, Some keratinized	MDSK	Yes	No	+	6, 11, 52	+	+	-	-
52	M	66	Biopsy	Glottic	Moderately Differentiated, Some keratinized	MDSK	Yes	No	+	16, 52	+	+	-	-
53	M	60	Laryngectomy	Transglottic	Moderately Differentiated, Some keratinized	MDSK	Yes	No	+	11, 52	+	+	-	-
54	M	67	Biopsy	Glottic	Highly Differentiated Invasive	HDI	Yes	No	+	45		+	-	-
55	M	69	Biopsy	Glottic	Moderately Differentiated, Some keratinized	MDSK	Yes	No	+	6, 11, 52	+	+	-	-
56	M	60	Laryngectomy	Glottic	Moderately Differentiated, Some keratinized	MDSK	Yes	No	+	11, 45	+	+	-	-
57	F	72	Biopsy	Glottic	Highly Differentiated Invasive	HDI	Yes	No	+	11, 52	+	+	+	-
58	M	72	Laryngectomy	Glottic	Moderately Differentiated, Some keratinized	MDSK	Yes	No	+	11, 52	+	+	-	-
59	M	51	Laryngectomy	Transglottic	Moderately Differentiated, Some keratinized	MDSK	Yes	No	+	52		+	+	-
60	M	61	Biopsy	Glottic	Moderately Differentiated, Some keratinized	MDSK	Yes	No	+	11, 52	+	+	-	-
61	M	78	Biopsy	Glottic	Moderately Differentiated, Some keratinized	MDSK	Yes	Yes	+	11, 16	+	+	-	-
62	M	61	Laryngectomy	Transglottic	Moderately Differentiated, Some keratinized	MDSK	Yes	No	+	6, 11, 52	+	+	-	-
63	M	56	Laryngectomy	Subglottic	Moderately Differentiated, Some keratinized	MDSK	Yes	No	+	11, 31, 52, 54	+	+	+	-
64	M	62	Biopsy	Glottic	Moderately Differentiated, Some keratinized	MDSK	Yes	No	+	11, 52	+	+	-	-
65	M	79	Biopsy	Glottic	Moderately Differentiated, Some keratinized	MDSK	Yes	No	+	11, 52	+	+	+	-
66	M	84	Laryngectomy	Glottic	Moderately Differentiated, Some keratinized	MDSK	Yes	No	+	6, 11, 52	+	+	-	-
67	M	55	Biopsy	Glottic	Moderately Differentiated, Some keratinized	MDSK	Yes	No	+	6, 11, 52	+	+	+	-
68	M	65	Laryngectomy	Transglottic	Moderately Differentiated, Some keratinized	MDSK	Yes	Yes	+	11, 16, 52	+	+	+	-
69	M	58	Laryngectomy	Transglottic	Moderately Differentiated, Some keratinized	MDSK	Yes	No	+	11, 52	+	+	-	-
70	M	72	Laryngectomy	Transglottic	Moderately Differentiated, Some keratinized	MDSK	No	No	+	11, 52	+	+	+	-
71	M	74	Laryngectomy	Transglottic	Moderately Differentiated, Some keratinized	MDSK	Yes	No	+	11, 31, 52, 54	+	+	-	-
72	M	71	Laryngectomy	Transglottic	Moderately Differentiated, Some keratinized	MDSK	Yes	No	+	11, 52	+	+	-	-
73	M	67	Laryngectomy	Glottic	Moderately Differentiated, Some keratinized	MDSK	Yes	No	+	52		+	-	-
74	M	72	Laryngectomy	Supraglottic	Moderately Differentiated, Some keratinized	MDSK	Yes	No	+	11, 31, 52, 54	+	+	+	-
75	M	84	Laryngectomy	Glottic	Moderately Differentiated, Some keratinized	MDSK	Yes	No	+	11, 26, 31, 52, 54	+	+	+	-
76	M	64	Laryngectomy	Glottic	Moderately Differentiated, Some keratinized	MDSK	Yes	No	+	11		-	+	-
77	M	44	Laryngectomy	Transglottic	Moderately Differentiated, Some keratinized	MDSK	Yes	No	+	11		-	-	-
78	M	62	Biopsy	Supraglottic	Moderately Differentiated, Some keratinized	MDSK	Yes	No	+	11		-	+	-
79	M	70	Biopsy	Glottic	Moderately Differentiated, Non- Keratinized	MDNK	Yes	No	+	11, 31, 52, 54	+	+	-	-
80	M	49	Biopsy	Glottic	Highly Differentiated Invasive	HDI	Yes	No	+	11, 52	+	+	-	-
81	M	72	Laryngectomy	Glottic	Moderately Differentiated, Some keratinized	MDSK	Yes	No	+	11, 31, 52, 54	+	+	-	-
82	M	40	Laryngectomy	Transglottic	Moderately Differentiated, Some keratinized	MDSK	Yes	No	-				+	-
83	M	68	Laryngectomy	Supraglottic	Moderately Differentiated, Some keratinized	MDSK	Yes	No	-				-	-
84	M	56	Biopsy	Glottic	Moderately Differentiated, Some keratinized	MDSK	Yes	No	+	6, 11, 16, 52	+	+	-	-
85	M	79	Biopsy	Supraglottic	Moderately Differentiated, Some keratinized	MDSK	Yes	No	+	11, 52	+	+	-	-
86	M	63	Biopsy	Glottic	Moderately Differentiated, Some keratinized	MDSK	Yes	No	+	11, 52	+	+	-	-
87	M	65	Laryngectomy	Glottic	Moderately Differentiated, Some keratinized	MDSK	Yes	No	+	6, 11	+	-	+	-
88	M	68	Laryngectomy	Transglottic	Moderately Differentiated, Some keratinized	MDSK	Yes	No	+	6, 11, 52	+	+	+	-
89	M	60	Biopsy	Glottic	Moderately Differentiated, Some keratinized	MDSK	Yes	No	+	11, 52	+	+	-	-
90	M	62	Laryngectomy	Transglottic	Moderately Differentiated, Some keratinized	MDSK	Yes	No	+	11, 31, 52	+	+	+	-
91	M	75	Biopsy	Glottic	Moderately Differentiated, Some keratinized	MDSK	Yes	No	+	11, 52	+	+	-	-
92	M	76	Laryngectomy	Transglottic	Moderately Differentiated, Some keratinized	MDSK	Yes	No	+	11, 31, 52	+	+	-	-
93	F	72	Biopsy	Glottic	Highly Differentiated Invasive	HDI	Yes	No	-				-	-
94	M	73	Laryngectomy	Transglottic	Moderately Differentiated, Some keratinized	MDSK	Yes	No	-				+	-
95	M	78	Biopsy	Glottic	Highly Differentiated Invasive	HDI	Yes	No	-				-	-
96	M	71	Biopsy	Glottic	Highly Differentiated Invasive	HDI	Yes	No	-				+	-
97	M	49	Laryngectomy	Glottic	Moderately Differentiated, Some keratinized	MDSK	Yes	No	+	52		+	-	-
98	M	49	Laryngectomy	Glottic	Moderately Differentiated, Some keratinized	MDSK	Yes	No	+	11		-	-	-
99	M	67	Biopsy	Supraglottic	Moderately Differentiated, Some keratinized	MDSK	Yes	No	+	52		+	-	-
100	M	81	Biopsy	Supraglottic	Moderately Differentiated, Some keratinized	MDSK	Yes	No	-				+	-
101	M	71	Laryngectomy	Transglottic	Moderately Differentiated, Some keratinized	MDSK	Yes	No	-				-	-
102	M	63	Biopsy	Supraglottic	Highly Differentiated Invasive	HDI	Yes	No	+	54, 52, 31	+	+	-	-
103	M	78	Biopsy	Glottic	Moderately Differentiated, Some keratinized	MDSK	Yes	No	-				-	-
104	M	49	Laryngectomy	Glottic	Moderately Differentiated, Some keratinized	MDSK	Yes	No	-				-	-
105	M	77	Biopsy	Glottic	Moderately Differentiated, Some keratinized	MDSK	Yes	No	-				-	-
106	M	67	Biopsy	Glottic	Moderately Differentiated, Some keratinized	MDSK	Yes	No	-				-	-
107	M	76	Biopsy	Glottic	Moderately Differentiated, Some keratinized	MDSK	No	No	-				-	-
108	M	75	Biopsy	Glottic	Moderately Differentiated, Some keratinized	MDSK	Yes	No	-				-	-
109	M	54	Biopsy	Glottic	Highly Differentiated Invasive	HDI	Yes	No	-				+	-
110	M	62	Biopsy	Glottic	High grade of sarcomatoid pattern	HGSP	Yes	No	-				-	-
111	M	59	Biopsy	Glottic	Moderately Differentiated, Some keratinized	MDSK	Yes	No	-				-	-
112	M	49	Laryngectomy	Glottic	Moderately Differentiated, Some keratinized	MDSK	Yes	No	-				+	-
113	M	76	Biopsy	Glottic	Moderately Differentiated, Some keratinized	MDSK	Yes	No	+	52		+	-	-
114	M	71	Biopsy	Glottic	Moderately Differentiated, Some keratinized	MDSK	Yes	No	+	52		+	-	-
115	M	56	Biopsy	Glottic	Highly Differentiated, keratinized	HDK	Yes	No	-				+	-
116	F	61	Biopsy	Glottic	Moderately Differentiated, Some keratinized	MDSK	Yes	No	+	11		-	-	-
117	M	70	Biopsy	Glottic	Moderately Differentiated, Some keratinized	MDSK	Yes	No	-				-	-
118	M	49	Biopsy	Glottic	Highly Differentiated Invasive	HDI	Yes	No	-				-	-
119	M	49	Biopsy	Transglottic	Moderately Differentiated, Some keratinized	MDSK	Yes	No	+	45		+	+	-
120	M	77	Biopsy	Glottic	Moderately Differentiated, Some keratinized	MDSK	Yes	No	+	45		+	+	-
121	M	78	Biopsy	Glottic	Moderately Differentiated, Some keratinized	MDSK	Yes	No	-				-	-
122	M	63	Biopsy	Glottic	Moderately Differentiated, Some keratinized	MDSK	Yes	No	-				-	-
123	M	75	Biopsy	Glottic	Moderately Differentiated, Some keratinized	MDSK	No	No	-				-	-
124	F	75	Biopsy	Glottic	Moderately Differentiated, Some keratinized	MDSK	Yes	No	+	45		+	-	-
125	M	49	Laryngectomy	Transglottic	Highly Differentiated Invasive	HDI	Yes	No	+	11		-	+	-
126	M	58	Biopsy	Glottic	Moderately Differentiated, Some keratinized	MDSK	Yes	No	-				-	-
127	M	54	Biopsy	Glottic	Highly Differentiated Invasive	HDI	Yes	No	-				-	-
128	M	68	Biopsy	Glottic	Highly Differentiated Invasive	HDI	Yes	No	-				-	-
129	M	49	Laryngectomy	Glottic	Moderately Differentiated, Some keratinized	MDSK	Yes	No	-				-	-
130	M	49	Laryngectomy	Transglottic	Highly Differentiated Invasive	HDI	Yes	No	+	11		-	-	-
131	F	66	Biopsy	Glottic	Moderately Differentiated, Some keratinized	MDSK	Yes	No	-				-	-
132	M	74	Biopsy	Glottic	Moderately Differentiated, Some keratinized	MDSK	Yes	No	-				-	-
133	M	63	Biopsy	Glottic	Highly Differentiated Invasive	HDI	Yes	No	+	45		+	-	-
134	M	71	Laryngectomy	Transglottic	Moderately Differentiated, Some keratinized	MDSK	Yes	No	-				+	-
135	F	64	Biopsy	Glottic	Moderately Differentiated, Some keratinized	MDSK	Yes	No	-				+	-
136	M	59	Biopsy	Supraglottic	Highly Differentiated, keratinized	HDK	Yes	No	-				+	-
137	M	53	Biopsy	Glottic	Moderately Differentiated, Some keratinized	MDSK	Yes	No	-				+	+
138	M	67	Biopsy	Supraglottic	Moderately Differentiated, Some keratinized	MDSK	Yes	No	-				-	+
139	M	69	Biopsy	Glottic	Moderately Differentiated, Some keratinized	MDSK	Yes	Yes	+	52		+	+	-
140	M	62	Biopsy	Glottic	Moderately Differentiated, Some keratinized	MDSK	Yes	No	-				+	-
141	M	58	Biopsy	Glottic	Moderately Differentiated, Some keratinized	MDSK	Yes	No	+	52		+	-	+
142	M	74	Biopsy	Glottic	Moderately Differentiated, Some keratinized	MDSK	Yes	No	-				+	-
143	M	45	Biopsy	Glottic	Moderately Differentiated, Some keratinized	MDSK	Yes	No	-				+	+
144	M	65	Biopsy	Glottic	Highly Differentiated Invasive	HDI	Yes	No	+	31, 52	+	+	-	-
145	M	67	Biopsy	Glottic	Moderately Differentiated, Some keratinized	MDSK	Yes	No	-				-	+
146	M	43	Biopsy	Glottic	Moderately Differentiated, Some keratinized	MDSK	Yes	No	-				+	-
147	M	67	Biopsy	Glottic	Moderately Differentiated, Some keratinized	MDSK	Yes	No	-				-	+
148	M	62	Biopsy	Glottic	Moderately Differentiated, Some keratinized	MDSK	Yes	No	+	52		+	+	-
149	M	75	Biopsy	Glottic	Moderately Differentiated, Some keratinized	MDSK	No	No	+	45		+	+	+
150	M	67	Biopsy	Glottic	Moderately Differentiated, Some keratinized	MDSK	Yes	No	-				-	-
151	M	71	Biopsy	Glottic	Moderately Differentiated, Some keratinized	MDSK	Yes	No	-				-	-
152	M	52	Biopsy	Glottic	Moderately Differentiated, Some keratinized	MDSK	Yes	No	+	11		-	-	-
153	M	76	Biopsy	Transglottic	Moderately Differentiated, Some keratinized	MDSK	Yes	No	-				-	-
154	F	66	Biopsy	Transglottic	Moderately Differentiated, Some keratinized	MDSK	Yes	No	-				-	-
155	M	67	Biopsy	Glottic	Moderately Differentiated, Some keratinized	MDSK	Yes	No	-				-	-
156	M	66	Biopsy	Supraglottic	Highly Differentiated Invasive	HDI	Yes	Yes	+	11		-	+	-
157	M	66	Biopsy	Glottic	Moderately Differentiated, Some keratinized	MDSK	Yes	No	+	11		-	-	-
158	M	49	Laryngectomy	Glottic	Moderately Differentiated, Some keratinized	MDSK	Yes	No	-				-	-
159	M	67	Biopsy	Glottic	Moderately Differentiated, Some keratinized	MDSK	Yes	No	-				+	-
160	M	80	Biopsy	Glottic	Moderately Differentiated, Some keratinized	MDSK	No	No	+	11		-	-	-
161	M	67	Biopsy	Glottic	Moderately Differentiated, Some keratinized	MDSK	Yes	No	-				-	-
162	M	67	Laryngectomy	Transglottic	Moderately Differentiated, Some keratinized	MDSK	Yes	No	-				-	-
163	M	60	Biopsy	Glottic	Moderately Differentiated, Some keratinized	MDSK	Yes	No	-				-	-
164	M	59	Biopsy	Glottic	Moderately Differentiated, Some keratinized	MDSK	Yes	No	-				-	-
165	M	67	Biopsy	Supraglottic	Moderately Differentiated, Some keratinized	MDSK	Yes	No	+	11		-	-	-
166	M	74	Biopsy	Glottic	Moderately Differentiated, Some keratinized	MDSK	Yes	No	-				-	-
167	M	55	Biopsy	Supraglottic	Moderately Differentiated, Some keratinized	MDSK	Yes	No	-				+	-
168	F	54	Biopsy	Glottic	Moderately Differentiated, Some keratinized	MDSK	Yes	No	+	11		-	-	-
169	M	49	Laryngectomy	Transglottic	Highly Differentiated Invasive	HDI	Yes	No	+	11		-	+	-
170	M	64	Biopsy	Glottic	Moderately Differentiated, Some keratinized	MDSK	No	No	-				-	-
171	M	76	Biopsy	Supraglottic	Moderately Differentiated, Some keratinized	MDSK	Yes	No	+	11		-	-	-
172	M	87	Biopsy	Supraglottic	Moderately Differentiated, Some keratinized	MDSK	Yes	No	-				-	-
173	M	71	Laryngectomy	Transglottic	Moderately Differentiated, Some keratinized	MDSK	Yes	No	+	11		-	+	-
174	M	79	Biopsy	Transglottic	Moderately Differentiated, Some keratinized	MDSK	Yes	No	-				+	-
175	M	45	Laryngectomy	Transglottic	Moderately Differentiated, Some keratinized	MDSK	Yes	No	-				-	-
176	M	64	Biopsy	Glottic	Highly Differentiated Invasive	HDI	Yes	No	-				-	-
177	M	70	Laryngectomy	Glottic	Moderately Differentiated, Some keratinized	MDSK	Yes	No	+	11		-	-	-
178	M	58	Laryngectomy	Subglottic	Moderately Differentiated, Some keratinized	MDSK	Yes	No	+	11		-	-	-
179	M	71	Biopsy	Glottic	Moderately Differentiated, Some keratinized	MDSK	Yes	No	-				-	-
180	M	54	Biopsy	Glottic	Moderately Differentiated, Some keratinized	MDSK	Yes	No	+	11, 16	+	+	-	-
181	M	65	Laryngectomy	Glottic	Moderately Differentiated, Some keratinized	MDSK	Yes	Yes	+	11		-	+	-
182	M	57	Biopsy	Glottic	Moderately Differentiated, Some keratinized	MDSK	Yes	No	-				-	-
183	M	66	Biopsy	Glottic	Moderately Differentiated, Some keratinized	MDSK	Yes	No	+	11		-	-	-
184	M	64	Biopsy	Glottic	Moderately Differentiated, Some keratinized	MDSK	Yes	No	+	11, 16, 40, 82	+	+	-	-
185	M	67	Biopsy	Supraglottic	Moderately Differentiated, Some keratinized	MDSK	Yes	No	+	11		-	-	-
186	M	35	Biopsy	Glottic	Moderately Differentiated, Some keratinized	MDSK	Yes	No	-				-	-
187	M	56	Laryngectomy	Subglottic	Moderately Differentiated, Some keratinized	MDSK	Yes	No	-				-	-
188	M	73	Laryngectomy	Transglottic	Highly Differentiated Invasive	HDI	Yes	No	-				+	-
189	M	71	Biopsy	Glottic	Moderately Differentiated, Some keratinized	MDSK	Yes	No	-				-	-
190	M	61	Biopsy	Glottic	Moderately Differentiated, Some keratinized	MDSK	Yes	No	-				-	-
191	M	64	Laryngectomy	Transglottic	Moderately Differentiated, Some keratinized	MDSK	Yes	No	+	11		-	-	-
192	M	46	Laryngectomy	Transglottic	Moderately Differentiated, Some keratinized	MDSK	Yes	No	-				-	-
193	M	75	Biopsy	Transglottic	Moderately Differentiated, Some keratinized	MDSK	Yes	No	-				-	-
194	M	67	Biopsy	Glottic	Moderately Differentiated, Some keratinized	MDSK	Yes	Yes	+	11		-	+	-
195	M	59	Biopsy	Glottic	Moderately Differentiated, Non- Keratinized	MDNK	Yes	No	+	16		+	-	-

## Sheet: Data + Alphanumeric for SPSS
Patient No.	Sex	Sex	Age	60+ years	Surgical Sample	Surgical Sample	Anatomical Location	Anatomical Location	Histopathological SCC Grading	Histopathological SCC Grading	Histopathological SCC Grading	Smoking	Smoking	Alcohol use	Alcohol use	HPV Infection	HPV Infection	HPV Genotype	Multiple HPV infection	Multiple HPV infection	HPV High Risk Detection	HPV High Risk Detection	HR-HPV 52	HR-HPV 16	HR-HPV 31	HR-HPV 45	HR-HPV 26	HR-HPV 82	EBV Infection	EBV Infection	MCPV Infection	MCPV Infection
1	M	1	89	1	Laryngectomy	2	Glottic	1	Poorly Differentiated, No keratinized	PDNK	1	Yes	1	Yes	1	-	2			2		2	2	2	2	2	2	2	+	1	-	2
2	M	1	61	1	Biopsy	1	Glottic	1	Moderately Differentiated, Some keratinized	MDSK	2	Yes	1	No	2	-	2			2		2	2	2	2	2	2	2	-	2	-	2
3	M	1	74	1	Biopsy	1	Supraglottic	3	Moderately Differentiated, Some keratinized	MDSK	2	Yes	1	No	2	-	2			2		2	2	2	2	2	2	2	-	2	-	2
4	M	1	81	1	Biopsy	1	Glottic	1	Moderately Differentiated, Some keratinized	MDSK	2	Yes	1	No	2	-	2			2		2	2	2	2	2	2	2	+	1	-	2
5	M	1	61	1	Laryngectomy	2	Subglottic	2	Moderately Differentiated, Some keratinized	MDSK	2	Yes	1	Yes	1	-	2			2		2	2	2	2	2	2	2	-	2	+	1
6	M	1	45	2	Biopsy	1	Glottic	1	Moderately Differentiated, Some keratinized	MDSK	2	Yes	1	No	2	-	2			2		2	2	2	2	2	2	2	-	2	-	2
7	M	1	61	1	Laryngectomy	2	Subglottic	2	Moderately Differentiated, Some keratinized	MDSK	2	Yes	1	Yes	1	+	1	11, 52	+	1	+	1	1	2	2	2	2	2	-	2	-	2
8	M	1	75	1	Biopsy	1	Glottic	1	Moderately Differentiated, Some keratinized	MDSK	2	Yes	1	No	2	+	1	52		2	+	1	1	2	2	2	2	2	-	2	-	2
9	M	1	53	2	Laryngectomy	2	Transglottic	4	Moderately Differentiated, Some keratinized	MDSK	2	Yes	1	No	2	+	1	16		2	+	1	2	1	2	2	2	2	-	2	-	2
10	M	1	61	1	Biopsy	1	Glottic	1	Moderately Differentiated, Some keratinized	MDSK	2	Yes	1	No	2	+	1	52		2	+	1	1	2	2	2	2	2	-	2	-	2
11	M	1	56	2	Laryngectomy	2	Transglottic	4	Moderately Differentiated, Some keratinized	MDSK	2	Yes	1	No	2	-	2			2		2	2	2	2	2	2	2	-	2	-	2
12	M	1	66	1	Biopsy	1	Glottic	1	Moderately Differentiated, Some keratinized	MDSK	2	Yes	1	No	2	-	2			2		2	2	2	2	2	2	2	+	1	-	2
13	M	1	61	1	Biopsy	1	Supraglottic	3	Moderately Differentiated, Some keratinized	MDSK	2	Yes	1	No	2	+	1	52		2	+	1	1	2	2	2	2	2	-	2	-	2
14	M	1	51	2	Biopsy	1	Glottic	1	Highly Differentiated Invasive	HDI	5	Yes	1	No	2	-	2			2		2	2	2	2	2	2	2	-	2	-	2
15	M	1	63	1	Biopsy	1	Glottic	1	Moderately Differentiated, Some keratinized	MDSK	2	Yes	1	No	2	+	1	16		2	+	1	2	1	2	2	2	2	-	2	+	1
16	M	1	58	2	Biopsy	1	Glottic	1	Moderately Differentiated, Some keratinized	MDSK	2	Yes	1	No	2	-	2			2		2	2	2	2	2	2	2	+	1	-	2
17	F	2	60	1	Biopsy	1	Glottic	1	Poorly Differentiated, No keratinized	PDNK	1	Yes	1	No	2	-	2			2		2	2	2	2	2	2	2	-	2	-	2
18	M	1	40	2	Laryngectomy	2	Transglottic	4	Moderately Differentiated, Some keratinized	MDSK	2	Yes	1	No	2	-	2			2		2	2	2	2	2	2	2	+	1	-	2
19	M	1	60	1	Laryngectomy	2	Transglottic	4	Moderately Differentiated, Some keratinized	MDSK	2	Yes	1	No	2	-	2			2		2	2	2	2	2	2	2	-	2	-	2
20	M	1	85	1	Biopsy	1	Supraglottic	3	Moderately Differentiated, Some keratinized	MDSK	2	Yes	1	No	2	-	2			2		2	2	2	2	2	2	2	+	1	-	2
21	M	1	61	1	Laryngectomy	2	Transglottic	4	Moderately Differentiated, Some keratinized	MDSK	2	Yes	1	No	2	-	2			2		2	2	2	2	2	2	2	+	1	-	2
22	M	1	66	1	Biopsy	1	Glottic	1	Moderately Differentiated, Some keratinized	MDSK	2	Yes	1	No	2	-	2			2		2	2	2	2	2	2	2	-	2	-	2
23	M	1	61	1	Biopsy	1	Supraglottic	3	Moderately Differentiated, Non- Keratinized	MDNK	3	Yes	1	No	2	-	2			2		2	2	2	2	2	2	2	+	1	-	2
24	M	1	65	1	Biopsy	1	Glottic	1	Highly Differentiated Invasive	HDI	5	Yes	1	No	2	-	2			2		2	2	2	2	2	2	2	-	2	-	2
25	M	1	63	1	Biopsy	1	Glottic	1	Moderately Differentiated, Some keratinized	MDSK	2	Yes	1	No	2	-	2			2		2	2	2	2	2	2	2	-	2	-	2
26	M	1	56	2	Laryngectomy	2	Transglottic	4	Moderately Differentiated, Some keratinized	MDSK	2	Yes	1	No	2	-	2			2		2	2	2	2	2	2	2	-	2	-	2
27	M	1	82	1	Biopsy	1	Glottic	1	Highly Differentiated Invasive	HDI	5	Yes	1	No	2	-	2			2		2	2	2	2	2	2	2	-	2	-	2
28	M	1	71	1	Laryngectomy	2	Transglottic	4	Moderately Differentiated, Some keratinized	MDSK	2	Yes	1	No	2	+	1	11, 52	+	1	+	1	1	2	2	2	2	2	-	2	-	2
29	M	1	68	1	Biopsy	1	Supraglottic	3	Moderately Differentiated, Some keratinized	MDSK	2	Yes	1	No	2	+	1	11, 16	+	1	+	1	2	1	2	2	2	2	-	2	-	2
30	M	1	78	1	Biopsy	1	Glottic	1	Moderately Differentiated, Some keratinized	MDSK	2	Yes	1	No	2	-	2			2		2	2	2	2	2	2	2	-	2	-	2
31	M	1	65	1	Biopsy	1	Glottic	1	Moderately Differentiated, Some keratinized	MDSK	2	Yes	1	No	2	-	2			2		2	2	2	2	2	2	2	-	2	-	2
32	M	1	69	1	Biopsy	1	Glottic	1	Moderately Differentiated, Some keratinized	MDSK	2	Yes	1	No	2	+	1	45		2	+	1	2	2	2	1	2	2	-	2	+	1
33	M	1	87	1	Biopsy	1	Glottic	1	Moderately Differentiated, Some keratinized	MDSK	2	Yes	1	No	2	-	2			2		2	2	2	2	2	2	2	-	2	-	2
34	M	1	71	1	Biopsy	1	Glottic	1	Moderately Differentiated, Some keratinized	MDSK	2	Yes	1	No	2	-	2			2		2	2	2	2	2	2	2	-	2	-	2
35	M	1	61	1	Laryngectomy	2	Subglottic	2	Moderately Differentiated, Some keratinized	MDSK	2	Yes	1	Yes	1	-	2			2		2	2	2	2	2	2	2	-	2	-	2
36	F	2	64	1	Biopsy	1	Glottic	1	Moderately Differentiated, Some keratinized	MDSK	2	Yes	1	No	2	-	2			2		2	2	2	2	2	2	2	-	2	-	2
37	M	1	60	1	Laryngectomy	2	Transglottic	4	Moderately Differentiated, Some keratinized	MDSK	2	Yes	1	No	2	-	2			2		2	2	2	2	2	2	2	-	2	-	2
38	M	1	60	1	Laryngectomy	2	Transglottic	4	Moderately Differentiated, Some keratinized	MDSK	2	Yes	1	No	2	-	2			2		2	2	2	2	2	2	2	+	1	-	2
39	M	1	76	1	Biopsy	1	Glottic	1	Highly Differentiated Invasive	HDI	5	Yes	1	No	2	-	2			2		2	2	2	2	2	2	2	-	2	-	2
40	M	1	76	1	Biopsy	1	Supraglottic	3	Moderately Differentiated, Some keratinized	MDSK	2	Yes	1	No	2	-	2			2		2	2	2	2	2	2	2	-	2	-	2
41	M	1	60	1	Laryngectomy	2	Transglottic	4	Moderately Differentiated, Some keratinized	MDSK	2	Yes	1	No	2	-	2			2		2	2	2	2	2	2	2	+	1	-	2
42	M	1	79	1	Biopsy	1	Supraglottic	3	Moderately Differentiated, Some keratinized	MDSK	2	Yes	1	No	2	+	1	11		2	-	2	2	2	2	2	2	2	-	2	-	2
43	M	1	70	1	Biopsy	1	Glottic	1	Moderately Differentiated, Some keratinized	MDSK	2	Yes	1	No	2	-	2			2		2	2	2	2	2	2	2	-	2	-	2
44	M	1	56	2	Laryngectomy	2	Transglottic	4	Moderately Differentiated, Some keratinized	MDSK	2	Yes	1	Yes	1	-	2			2		2	2	2	2	2	2	2	-	2	-	2
45	M	1	81	1	Biopsy	1	Glottic	1	Moderately Differentiated, Some keratinized	MDSK	2	Yes	1	No	2	+	1	11, 52	+	1	+	1	1	2	2	2	2	2	-	2	+	1
46	M	1	67	1	Biopsy	1	Glottic	1	Moderately Differentiated, Some keratinized	MDSK	2	Yes	1	No	2	+	1	11, 16	+	1	+	1	2	1	2	2	2	2	-	2	-	2
47	M	1	71	1	Laryngectomy	2	Transglottic	4	Moderately Differentiated, Some keratinized	MDSK	2	Yes	1	No	2	+	1	6, 11, 52	+	1	+	1	1	2	2	2	2	2	-	2	-	2
48	M	1	80	1	Biopsy	1	Supraglottic	3	Moderately Differentiated, Some keratinized	MDSK	2	Yes	1	No	2	+	1	6, 11	+	1	-	2	2	2	2	2	2	2	-	2	-	2
49	M	1	63	1	Laryngectomy	2	Transglottic	4	Moderately Differentiated, Some keratinized	MDSK	2	Yes	1	No	2	+	1	11, 52	+	1	+	1	1	2	2	2	2	2	-	2	-	2
50	M	1	68	1	Laryngectomy	2	Glottic	1	Moderately Differentiated, Some keratinized	MDSK	2	No	2	Yes	1	+	1	11, 45, 52	+	1	+	1	1	2	2	1	2	2	-	2	-	2
51	M	1	83	1	Biopsy	1	Supraglottic	3	Moderately Differentiated, Some keratinized	MDSK	2	Yes	1	No	2	+	1	6, 11, 52	+	1	+	1	1	2	2	2	2	2	-	2	-	2
52	M	1	66	1	Biopsy	1	Glottic	1	Moderately Differentiated, Some keratinized	MDSK	2	Yes	1	No	2	+	1	16, 52	+	1	+	1	1	1	2	2	2	2	-	2	-	2
53	M	1	60	1	Laryngectomy	2	Transglottic	4	Moderately Differentiated, Some keratinized	MDSK	2	Yes	1	No	2	+	1	11, 52	+	1	+	1	1	2	2	2	2	2	-	2	-	2
54	M	1	67	1	Biopsy	1	Glottic	1	Highly Differentiated Invasive	HDI	5	Yes	1	No	2	+	1	45		2	+	1	2	2	2	1	2	2	-	2	-	2
55	M	1	69	1	Biopsy	1	Glottic	1	Moderately Differentiated, Some keratinized	MDSK	2	Yes	1	No	2	+	1	6, 11, 52	+	1	+	1	1	2	2	2	2	2	-	2	-	2
56	M	1	60	1	Laryngectomy	2	Glottic	1	Moderately Differentiated, Some keratinized	MDSK	2	Yes	1	No	2	+	1	11, 45	+	1	+	1	2	2	2	1	2	2	-	2	-	2
57	F	2	72	1	Biopsy	1	Glottic	1	Highly Differentiated Invasive	HDI	5	Yes	1	No	2	+	1	11, 52	+	1	+	1	1	2	2	2	2	2	+	1	-	2
58	M	1	72	1	Laryngectomy	2	Glottic	1	Moderately Differentiated, Some keratinized	MDSK	2	Yes	1	No	2	+	1	11, 52	+	1	+	1	1	2	2	2	2	2	-	2	-	2
59	M	1	51	2	Laryngectomy	2	Transglottic	4	Moderately Differentiated, Some keratinized	MDSK	2	Yes	1	No	2	+	1	52		2	+	1	1	2	2	2	2	2	+	1	-	2
60	M	1	61	1	Biopsy	1	Glottic	1	Moderately Differentiated, Some keratinized	MDSK	2	Yes	1	No	2	+	1	11, 52	+	1	+	1	1	2	2	2	2	2	-	2	-	2
61	M	1	78	1	Biopsy	1	Glottic	1	Moderately Differentiated, Some keratinized	MDSK	2	Yes	1	Yes	1	+	1	11, 16	+	1	+	1	2	1	2	2	2	2	-	2	-	2
62	M	1	61	1	Laryngectomy	2	Transglottic	4	Moderately Differentiated, Some keratinized	MDSK	2	Yes	1	No	2	+	1	6, 11, 52	+	1	+	1	1	2	2	2	2	2	-	2	-	2
63	M	1	56	2	Laryngectomy	2	Subglottic	2	Moderately Differentiated, Some keratinized	MDSK	2	Yes	1	No	2	+	1	11, 31, 52, 54	+	1	+	1	1	2	1	2	2	2	+	1	-	2
64	M	1	62	1	Biopsy	1	Glottic	1	Moderately Differentiated, Some keratinized	MDSK	2	Yes	1	No	2	+	1	11, 52	+	1	+	1	1	2	2	2	2	2	-	2	-	2
65	M	1	79	1	Biopsy	1	Glottic	1	Moderately Differentiated, Some keratinized	MDSK	2	Yes	1	No	2	+	1	11, 52	+	1	+	1	1	2	2	2	2	2	+	1	-	2
66	M	1	84	1	Laryngectomy	2	Glottic	1	Moderately Differentiated, Some keratinized	MDSK	2	Yes	1	No	2	+	1	6, 11, 52	+	1	+	1	1	2	2	2	2	2	-	2	-	2
67	M	1	55	2	Biopsy	1	Glottic	1	Moderately Differentiated, Some keratinized	MDSK	2	Yes	1	No	2	+	1	6, 11, 52	+	1	+	1	1	2	2	2	2	2	+	1	-	2
68	M	1	65	1	Laryngectomy	2	Transglottic	4	Moderately Differentiated, Some keratinized	MDSK	2	Yes	1	Yes	1	+	1	11, 16, 52	+	1	+	1	1	1	2	2	2	2	+	1	-	2
69	M	1	58	2	Laryngectomy	2	Transglottic	4	Moderately Differentiated, Some keratinized	MDSK	2	Yes	1	No	2	+	1	11, 52	+	1	+	1	1	2	2	2	2	2	-	2	-	2
70	M	1	72	1	Laryngectomy	2	Transglottic	4	Moderately Differentiated, Some keratinized	MDSK	2	No	2	No	2	+	1	11, 52	+	1	+	1	1	2	2	2	2	2	+	1	-	2
71	M	1	74	1	Laryngectomy	2	Transglottic	4	Moderately Differentiated, Some keratinized	MDSK	2	Yes	1	No	2	+	1	11, 31, 52, 54	+	1	+	1	1	2	1	2	2	2	-	2	-	2
72	M	1	71	1	Laryngectomy	2	Transglottic	4	Moderately Differentiated, Some keratinized	MDSK	2	Yes	1	No	2	+	1	11, 52	+	1	+	1	1	2	2	2	2	2	-	2	-	2
73	M	1	67	1	Laryngectomy	2	Glottic	1	Moderately Differentiated, Some keratinized	MDSK	2	Yes	1	No	2	+	1	52		2	+	1	1	2	2	2	2	2	-	2	-	2
74	M	1	72	1	Laryngectomy	2	Supraglottic	3	Moderately Differentiated, Some keratinized	MDSK	2	Yes	1	No	2	+	1	11, 31, 52, 54	+	1	+	1	1	2	1	2	2	2	+	1	-	2
75	M	1	84	1	Laryngectomy	2	Glottic	1	Moderately Differentiated, Some keratinized	MDSK	2	Yes	1	No	2	+	1	11, 26, 31, 52, 54	+	1	+	1	1	2	1	2	1	2	+	1	-	2
76	M	1	64	1	Laryngectomy	2	Glottic	1	Moderately Differentiated, Some keratinized	MDSK	2	Yes	1	No	2	+	1	11		2	-	2	2	2	2	2	2	2	+	1	-	2
77	M	1	44	2	Laryngectomy	2	Transglottic	4	Moderately Differentiated, Some keratinized	MDSK	2	Yes	1	No	2	+	1	11		2	-	2	2	2	2	2	2	2	-	2	-	2
78	M	1	62	1	Biopsy	1	Supraglottic	3	Moderately Differentiated, Some keratinized	MDSK	2	Yes	1	No	2	+	1	11		2	-	2	2	2	2	2	2	2	+	1	-	2
79	M	1	70	1	Biopsy	1	Glottic	1	Moderately Differentiated, Non- Keratinized	MDNK	3	Yes	1	No	2	+	1	11, 31, 52, 54	+	1	+	1	1	2	1	2	2	2	-	2	-	2
80	M	1	49	2	Biopsy	1	Glottic	1	Highly Differentiated Invasive	HDI	5	Yes	1	No	2	+	1	11, 52	+	1	+	1	1	2	2	2	2	2	-	2	-	2
81	M	1	72	1	Laryngectomy	2	Glottic	1	Moderately Differentiated, Some keratinized	MDSK	2	Yes	1	No	2	+	1	11, 31, 52, 54	+	1	+	1	1	2	1	2	2	2	-	2	-	2
82	M	1	40	2	Laryngectomy	2	Transglottic	4	Moderately Differentiated, Some keratinized	MDSK	2	Yes	1	No	2	-	2			2		2	2	2	2	2	2	2	+	1	-	2
83	M	1	68	1	Laryngectomy	2	Supraglottic	3	Moderately Differentiated, Some keratinized	MDSK	2	Yes	1	No	2	-	2			2		2	2	2	2	2	2	2	-	2	-	2
84	M	1	56	2	Biopsy	1	Glottic	1	Moderately Differentiated, Some keratinized	MDSK	2	Yes	1	No	2	+	1	6, 11, 16, 52	+	1	+	1	1	1	2	2	2	2	-	2	-	2
85	M	1	79	1	Biopsy	1	Supraglottic	3	Moderately Differentiated, Some keratinized	MDSK	2	Yes	1	No	2	+	1	11, 52	+	1	+	1	1	2	2	2	2	2	-	2	-	2
86	M	1	63	1	Biopsy	1	Glottic	1	Moderately Differentiated, Some keratinized	MDSK	2	Yes	1	No	2	+	1	11, 52	+	1	+	1	1	2	2	2	2	2	-	2	-	2
87	M	1	65	1	Laryngectomy	2	Glottic	1	Moderately Differentiated, Some keratinized	MDSK	2	Yes	1	No	2	+	1	6, 11	+	1	-	2	2	2	2	2	2	2	+	1	-	2
88	M	1	68	1	Laryngectomy	2	Transglottic	4	Moderately Differentiated, Some keratinized	MDSK	2	Yes	1	No	2	+	1	6, 11, 52	+	1	+	1	1	2	2	2	2	2	+	1	-	2
89	M	1	60	1	Biopsy	1	Glottic	1	Moderately Differentiated, Some keratinized	MDSK	2	Yes	1	No	2	+	1	11, 52	+	1	+	1	1	2	2	2	2	2	-	2	-	2
90	M	1	62	1	Laryngectomy	2	Transglottic	4	Moderately Differentiated, Some keratinized	MDSK	2	Yes	1	No	2	+	1	11, 31, 52	+	1	+	1	1	2	1	2	2	2	+	1	-	2
91	M	1	75	1	Biopsy	1	Glottic	1	Moderately Differentiated, Some keratinized	MDSK	2	Yes	1	No	2	+	1	11, 52	+	1	+	1	1	2	2	2	2	2	-	2	-	2
92	M	1	76	1	Laryngectomy	2	Transglottic	4	Moderately Differentiated, Some keratinized	MDSK	2	Yes	1	No	2	+	1	11, 31, 52	+	1	+	1	1	2	1	2	2	2	-	2	-	2
93	F	2	72	1	Biopsy	1	Glottic	1	Highly Differentiated Invasive	HDI	5	Yes	1	No	2	-	2			2		2	2	2	2	2	2	2	-	2	-	2
94	M	1	73	1	Laryngectomy	2	Transglottic	4	Moderately Differentiated, Some keratinized	MDSK	2	Yes	1	No	2	-	2			2		2	2	2	2	2	2	2	+	1	-	2
95	M	1	78	1	Biopsy	1	Glottic	1	Highly Differentiated Invasive	HDI	5	Yes	1	No	2	-	2			2		2	2	2	2	2	2	2	-	2	-	2
96	M	1	71	1	Biopsy	1	Glottic	1	Highly Differentiated Invasive	HDI	5	Yes	1	No	2	-	2			2		2	2	2	2	2	2	2	+	1	-	2
97	M	1	49	2	Laryngectomy	2	Glottic	1	Moderately Differentiated, Some keratinized	MDSK	2	Yes	1	No	2	+	1	52		2	+	1	1	2	2	2	2	2	-	2	-	2
98	M	1	49	2	Laryngectomy	2	Glottic	1	Moderately Differentiated, Some keratinized	MDSK	2	Yes	1	No	2	+	1	11		2	-	2	2	2	2	2	2	2	-	2	-	2
99	M	1	67	1	Biopsy	1	Supraglottic	3	Moderately Differentiated, Some keratinized	MDSK	2	Yes	1	No	2	+	1	52		2	+	1	1	2	2	2	2	2	-	2	-	2
100	M	1	81	1	Biopsy	1	Supraglottic	3	Moderately Differentiated, Some keratinized	MDSK	2	Yes	1	No	2	-	2			2		2	2	2	2	2	2	2	+	1	-	2
101	M	1	71	1	Laryngectomy	2	Transglottic	4	Moderately Differentiated, Some keratinized	MDSK	2	Yes	1	No	2	-	2			2		2	2	2	2	2	2	2	-	2	-	2
102	M	1	63	1	Biopsy	1	Supraglottic	3	Highly Differentiated Invasive	HDI	5	Yes	1	No	2	+	1	54, 52, 31	+	1	+	1	1	2	1	2	2	2	-	2	-	2
103	M	1	78	1	Biopsy	1	Glottic	1	Moderately Differentiated, Some keratinized	MDSK	2	Yes	1	No	2	-	2			2		2	2	2	2	2	2	2	-	2	-	2
104	M	1	49	2	Laryngectomy	2	Glottic	1	Moderately Differentiated, Some keratinized	MDSK	2	Yes	1	No	2	-	2			2		2	2	2	2	2	2	2	-	2	-	2
105	M	1	77	1	Biopsy	1	Glottic	1	Moderately Differentiated, Some keratinized	MDSK	2	Yes	1	No	2	-	2			2		2	2	2	2	2	2	2	-	2	-	2
106	M	1	67	1	Biopsy	1	Glottic	1	Moderately Differentiated, Some keratinized	MDSK	2	Yes	1	No	2	-	2			2		2	2	2	2	2	2	2	-	2	-	2
107	M	1	76	1	Biopsy	1	Glottic	1	Moderately Differentiated, Some keratinized	MDSK	2	No	2	No	2	-	2			2		2	2	2	2	2	2	2	-	2	-	2
108	M	1	75	1	Biopsy	1	Glottic	1	Moderately Differentiated, Some keratinized	MDSK	2	Yes	1	No	2	-	2			2		2	2	2	2	2	2	2	-	2	-	2
109	M	1	54	2	Biopsy	1	Glottic	1	Highly Differentiated Invasive	HDI	5	Yes	1	No	2	-	2			2		2	2	2	2	2	2	2	+	1	-	2
110	M	1	62	1	Biopsy	1	Glottic	1	High grade of sarcomatoid pattern	HGSP	6	Yes	1	No	2	-	2			2		2	2	2	2	2	2	2	-	2	-	2
111	M	1	59	2	Biopsy	1	Glottic	1	Moderately Differentiated, Some keratinized	MDSK	2	Yes	1	No	2	-	2			2		2	2	2	2	2	2	2	-	2	-	2
112	M	1	49	2	Laryngectomy	2	Glottic	1	Moderately Differentiated, Some keratinized	MDSK	2	Yes	1	No	2	-	2			2		2	2	2	2	2	2	2	+	1	-	2
113	M	1	76	1	Biopsy	1	Glottic	1	Moderately Differentiated, Some keratinized	MDSK	2	Yes	1	No	2	+	1	52		2	+	1	1	2	2	2	2	2	-	2	-	2
114	M	1	71	1	Biopsy	1	Glottic	1	Moderately Differentiated, Some keratinized	MDSK	2	Yes	1	No	2	+	1	52		2	+	1	1	2	2	2	2	2	-	2	-	2
115	M	1	56	2	Biopsy	1	Glottic	1	Highly Differentiated, keratinized	HDK	4	Yes	1	No	2	-	2			2		2	2	2	2	2	2	2	+	1	-	2
116	F	2	61	1	Biopsy	1	Glottic	1	Moderately Differentiated, Some keratinized	MDSK	2	Yes	1	No	2	+	1	11		2	-	2	2	2	2	2	2	2	-	2	-	2
117	M	1	70	1	Biopsy	1	Glottic	1	Moderately Differentiated, Some keratinized	MDSK	2	Yes	1	No	2	-	2			2		2	2	2	2	2	2	2	-	2	-	2
118	M	1	49	2	Biopsy	1	Glottic	1	Highly Differentiated Invasive	HDI	5	Yes	1	No	2	-	2			2		2	2	2	2	2	2	2	-	2	-	2
119	M	1	49	2	Biopsy	1	Transglottic	4	Moderately Differentiated, Some keratinized	MDSK	2	Yes	1	No	2	+	1	45		2	+	1	2	2	2	1	2	2	+	1	-	2
120	M	1	77	1	Biopsy	1	Glottic	1	Moderately Differentiated, Some keratinized	MDSK	2	Yes	1	No	2	+	1	45		2	+	1	2	2	2	1	2	2	+	1	-	2
121	M	1	78	1	Biopsy	1	Glottic	1	Moderately Differentiated, Some keratinized	MDSK	2	Yes	1	No	2	-	2			2		2	2	2	2	2	2	2	-	2	-	2
122	M	1	63	1	Biopsy	1	Glottic	1	Moderately Differentiated, Some keratinized	MDSK	2	Yes	1	No	2	-	2			2		2	2	2	2	2	2	2	-	2	-	2
123	M	1	75	1	Biopsy	1	Glottic	1	Moderately Differentiated, Some keratinized	MDSK	2	No	2	No	2	-	2			2		2	2	2	2	2	2	2	-	2	-	2
124	F	2	75	1	Biopsy	1	Glottic	1	Moderately Differentiated, Some keratinized	MDSK	2	Yes	1	No	2	+	1	45		2	+	1	2	2	2	1	2	2	-	2	-	2
125	M	1	49	2	Laryngectomy	2	Transglottic	4	Highly Differentiated Invasive	HDI	5	Yes	1	No	2	+	1	11		2	-	2	2	2	2	2	2	2	+	1	-	2
126	M	1	58	2	Biopsy	1	Glottic	1	Moderately Differentiated, Some keratinized	MDSK	2	Yes	1	No	2	-	2			2		2	2	2	2	2	2	2	-	2	-	2
127	M	1	54	2	Biopsy	1	Glottic	1	Highly Differentiated Invasive	HDI	5	Yes	1	No	2	-	2			2		2	2	2	2	2	2	2	-	2	-	2
128	M	1	68	1	Biopsy	1	Glottic	1	Highly Differentiated Invasive	HDI	5	Yes	1	No	2	-	2			2		2	2	2	2	2	2	2	-	2	-	2
129	M	1	49	2	Laryngectomy	2	Glottic	1	Moderately Differentiated, Some keratinized	MDSK	2	Yes	1	No	2	-	2			2		2	2	2	2	2	2	2	-	2	-	2
130	M	1	49	2	Laryngectomy	2	Transglottic	4	Highly Differentiated Invasive	HDI	5	Yes	1	No	2	+	1	11		2	-	2	2	2	2	2	2	2	-	2	-	2
131	F	2	66	1	Biopsy	1	Glottic	1	Moderately Differentiated, Some keratinized	MDSK	2	Yes	1	No	2	-	2			2		2	2	2	2	2	2	2	-	2	-	2
132	M	1	74	1	Biopsy	1	Glottic	1	Moderately Differentiated, Some keratinized	MDSK	2	Yes	1	No	2	-	2			2		2	2	2	2	2	2	2	-	2	-	2
133	M	1	63	1	Biopsy	1	Glottic	1	Highly Differentiated Invasive	HDI	5	Yes	1	No	2	+	1	45		2	+	1	2	2	2	1	2	2	-	2	-	2
134	M	1	71	1	Laryngectomy	2	Transglottic	4	Moderately Differentiated, Some keratinized	MDSK	2	Yes	1	No	2	-	2			2		2	2	2	2	2	2	2	+	1	-	2
135	F	2	64	1	Biopsy	1	Glottic	1	Moderately Differentiated, Some keratinized	MDSK	2	Yes	1	No	2	-	2			2		2	2	2	2	2	2	2	+	1	-	2
136	M	1	59	2	Biopsy	1	Supraglottic	3	Highly Differentiated, keratinized	HDK	4	Yes	1	No	2	-	2			2		2	2	2	2	2	2	2	+	1	-	2
137	M	1	53	2	Biopsy	1	Glottic	1	Moderately Differentiated, Some keratinized	MDSK	2	Yes	1	No	2	-	2			2		2	2	2	2	2	2	2	+	1	+	1
138	M	1	67	1	Biopsy	1	Supraglottic	3	Moderately Differentiated, Some keratinized	MDSK	2	Yes	1	No	2	-	2			2		2	2	2	2	2	2	2	-	2	+	1
139	M	1	69	1	Biopsy	1	Glottic	1	Moderately Differentiated, Some keratinized	MDSK	2	Yes	1	Yes	1	+	1	52		2	+	1	1	2	2	2	2	2	+	1	-	2
140	M	1	62	1	Biopsy	1	Glottic	1	Moderately Differentiated, Some keratinized	MDSK	2	Yes	1	No	2	-	2			2		2	2	2	2	2	2	2	+	1	-	2
141	M	1	58	2	Biopsy	1	Glottic	1	Moderately Differentiated, Some keratinized	MDSK	2	Yes	1	No	2	+	1	52		2	+	1	1	2	2	2	2	2	-	2	+	1
142	M	1	74	1	Biopsy	1	Glottic	1	Moderately Differentiated, Some keratinized	MDSK	2	Yes	1	No	2	-	2			2		2	2	2	2	2	2	2	+	1	-	2
143	M	1	45	2	Biopsy	1	Glottic	1	Moderately Differentiated, Some keratinized	MDSK	2	Yes	1	No	2	-	2			2		2	2	2	2	2	2	2	+	1	+	1
144	M	1	65	1	Biopsy	1	Glottic	1	Highly Differentiated Invasive	HDI	5	Yes	1	No	2	+	1	31, 52	+	1	+	1	1	2	1	2	2	2	-	2	-	2
145	M	1	67	1	Biopsy	1	Glottic	1	Moderately Differentiated, Some keratinized	MDSK	2	Yes	1	No	2	-	2			2		2	2	2	2	2	2	2	-	2	+	1
146	M	1	43	2	Biopsy	1	Glottic	1	Moderately Differentiated, Some keratinized	MDSK	2	Yes	1	No	2	-	2			2		2	2	2	2	2	2	2	+	1	-	2
147	M	1	67	1	Biopsy	1	Glottic	1	Moderately Differentiated, Some keratinized	MDSK	2	Yes	1	No	2	-	2			2		2	2	2	2	2	2	2	-	2	+	1
148	M	1	62	1	Biopsy	1	Glottic	1	Moderately Differentiated, Some keratinized	MDSK	2	Yes	1	No	2	+	1	52		2	+	1	1	2	2	2	2	2	+	1	-	2
149	M	1	75	1	Biopsy	1	Glottic	1	Moderately Differentiated, Some keratinized	MDSK	2	No	2	No	2	+	1	45		2	+	1	2	2	2	1	2	2	+	1	+	1
150	M	1	67	1	Biopsy	1	Glottic	1	Moderately Differentiated, Some keratinized	MDSK	2	Yes	1	No	2	-	2			2		2	2	2	2	2	2	2	-	2	-	2
151	M	1	71	1	Biopsy	1	Glottic	1	Moderately Differentiated, Some keratinized	MDSK	2	Yes	1	No	2	-	2			2		2	2	2	2	2	2	2	-	2	-	2
152	M	1	52	2	Biopsy	1	Glottic	1	Moderately Differentiated, Some keratinized	MDSK	2	Yes	1	No	2	+	1	11		2	-	2	2	2	2	2	2	2	-	2	-	2
153	M	1	76	1	Biopsy	1	Transglottic	4	Moderately Differentiated, Some keratinized	MDSK	2	Yes	1	No	2	-	2			2		2	2	2	2	2	2	2	-	2	-	2
154	F	2	66	1	Biopsy	1	Transglottic	4	Moderately Differentiated, Some keratinized	MDSK	2	Yes	1	No	2	-	2			2		2	2	2	2	2	2	2	-	2	-	2
155	M	1	67	1	Biopsy	1	Glottic	1	Moderately Differentiated, Some keratinized	MDSK	2	Yes	1	No	2	-	2			2		2	2	2	2	2	2	2	-	2	-	2
156	M	1	66	1	Biopsy	1	Supraglottic	3	Highly Differentiated Invasive	HDI	5	Yes	1	Yes	1	+	1	11		2	-	2	2	2	2	2	2	2	+	1	-	2
157	M	1	66	1	Biopsy	1	Glottic	1	Moderately Differentiated, Some keratinized	MDSK	2	Yes	1	No	2	+	1	11		2	-	2	2	2	2	2	2	2	-	2	-	2
158	M	1	49	2	Laryngectomy	2	Glottic	1	Moderately Differentiated, Some keratinized	MDSK	2	Yes	1	No	2	-	2			2		2	2	2	2	2	2	2	-	2	-	2
159	M	1	67	1	Biopsy	1	Glottic	1	Moderately Differentiated, Some keratinized	MDSK	2	Yes	1	No	2	-	2			2		2	2	2	2	2	2	2	+	1	-	2
160	M	1	80	1	Biopsy	1	Glottic	1	Moderately Differentiated, Some keratinized	MDSK	2	No	2	No	2	+	1	11		2	-	2	2	2	2	2	2	2	-	2	-	2
161	M	1	67	1	Biopsy	1	Glottic	1	Moderately Differentiated, Some keratinized	MDSK	2	Yes	1	No	2	-	2			2		2	2	2	2	2	2	2	-	2	-	2
162	M	1	67	1	Laryngectomy	2	Transglottic	4	Moderately Differentiated, Some keratinized	MDSK	2	Yes	1	No	2	-	2			2		2	2	2	2	2	2	2	-	2	-	2
163	M	1	60	1	Biopsy	1	Glottic	1	Moderately Differentiated, Some keratinized	MDSK	2	Yes	1	No	2	-	2			2		2	2	2	2	2	2	2	-	2	-	2
164	M	1	59	2	Biopsy	1	Glottic	1	Moderately Differentiated, Some keratinized	MDSK	2	Yes	1	No	2	-	2			2		2	2	2	2	2	2	2	-	2	-	2
165	M	1	67	1	Biopsy	1	Supraglottic	3	Moderately Differentiated, Some keratinized	MDSK	2	Yes	1	No	2	+	1	11		2	-	2	2	2	2	2	2	2	-	2	-	2
166	M	1	74	1	Biopsy	1	Glottic	1	Moderately Differentiated, Some keratinized	MDSK	2	Yes	1	No	2	-	2			2		2	2	2	2	2	2	2	-	2	-	2
167	M	1	55	2	Biopsy	1	Supraglottic	3	Moderately Differentiated, Some keratinized	MDSK	2	Yes	1	No	2	-	2			2		2	2	2	2	2	2	2	+	1	-	2
168	F	2	54	2	Biopsy	1	Glottic	1	Moderately Differentiated, Some keratinized	MDSK	2	Yes	1	No	2	+	1	11		2	-	2	2	2	2	2	2	2	-	2	-	2
169	M	1	49	2	Laryngectomy	2	Transglottic	4	Highly Differentiated Invasive	HDI	5	Yes	1	No	2	+	1	11		2	-	2	2	2	2	2	2	2	+	1	-	2
170	M	1	64	1	Biopsy	1	Glottic	1	Moderately Differentiated, Some keratinized	MDSK	2	No	2	No	2	-	2			2		2	2	2	2	2	2	2	-	2	-	2
171	M	1	76	1	Biopsy	1	Supraglottic	3	Moderately Differentiated, Some keratinized	MDSK	2	Yes	1	No	2	+	1	11		2	-	2	2	2	2	2	2	2	-	2	-	2
172	M	1	87	1	Biopsy	1	Supraglottic	3	Moderately Differentiated, Some keratinized	MDSK	2	Yes	1	No	2	-	2			2		2	2	2	2	2	2	2	-	2	-	2
173	M	1	71	1	Laryngectomy	2	Transglottic	4	Moderately Differentiated, Some keratinized	MDSK	2	Yes	1	No	2	+	1	11		2	-	2	2	2	2	2	2	2	+	1	-	2
174	M	1	79	1	Biopsy	1	Transglottic	4	Moderately Differentiated, Some keratinized	MDSK	2	Yes	1	No	2	-	2			2		2	2	2	2	2	2	2	+	1	-	2
175	M	1	45	2	Laryngectomy	2	Transglottic	4	Moderately Differentiated, Some keratinized	MDSK	2	Yes	1	No	2	-	2			2		2	2	2	2	2	2	2	-	2	-	2
176	M	1	64	1	Biopsy	1	Glottic	1	Highly Differentiated Invasive	HDI	5	Yes	1	No	2	-	2			2		2	2	2	2	2	2	2	-	2	-	2
177	M	1	70	1	Laryngectomy	2	Glottic	1	Moderately Differentiated, Some keratinized	MDSK	2	Yes	1	No	2	+	1	11		2	-	2	2	2	2	2	2	2	-	2	-	2
178	M	1	58	2	Laryngectomy	2	Subglottic	2	Moderately Differentiated, Some keratinized	MDSK	2	Yes	1	No	2	+	1	11		2	-	2	2	2	2	2	2	2	-	2	-	2
179	M	1	71	1	Biopsy	1	Glottic	1	Moderately Differentiated, Some keratinized	MDSK	2	Yes	1	No	2	-	2			2		2	2	2	2	2	2	2	-	2	-	2
180	M	1	54	2	Biopsy	1	Glottic	1	Moderately Differentiated, Some keratinized	MDSK	2	Yes	1	No	2	+	1	11, 16	+	1	+	1	2	1	2	2	2	2	-	2	-	2
181	M	1	65	1	Laryngectomy	2	Glottic	1	Moderately Differentiated, Some keratinized	MDSK	2	Yes	1	Yes	1	+	1	11		2	-	2	2	2	2	2	2	2	+	1	-	2
182	M	1	57	2	Biopsy	1	Glottic	1	Moderately Differentiated, Some keratinized	MDSK	2	Yes	1	No	2	-	2			2		2	2	2	2	2	2	2	-	2	-	2
183	M	1	66	1	Biopsy	1	Glottic	1	Moderately Differentiated, Some keratinized	MDSK	2	Yes	1	No	2	+	1	11		2	-	2	2	2	2	2	2	2	-	2	-	2
184	M	1	64	1	Biopsy	1	Glottic	1	Moderately Differentiated, Some keratinized	MDSK	2	Yes	1	No	2	+	1	11, 16, 40, 82	+	1	+	1	2	1	2	2	2	1	-	2	-	2
185	M	1	67	1	Biopsy	1	Supraglottic	3	Moderately Differentiated, Some keratinized	MDSK	2	Yes	1	No	2	+	1	11		2	-	2	2	2	2	2	2	2	-	2	-	2
186	M	1	35	2	Biopsy	1	Glottic	1	Moderately Differentiated, Some keratinized	MDSK	2	Yes	1	No	2	-	2			2		2	2	2	2	2	2	2	-	2	-	2
187	M	1	56	2	Laryngectomy	2	Subglottic	2	Moderately Differentiated, Some keratinized	MDSK	2	Yes	1	No	2	-	2			2		2	2	2	2	2	2	2	-	2	-	2
188	M	1	73	1	Laryngectomy	2	Transglottic	4	Highly Differentiated Invasive	HDI	5	Yes	1	No	2	-	2			2		2	2	2	2	2	2	2	+	1	-	2
189	M	1	71	1	Biopsy	1	Glottic	1	Moderately Differentiated, Some keratinized	MDSK	2	Yes	1	No	2	-	2			2		2	2	2	2	2	2	2	-	2	-	2
190	M	1	61	1	Biopsy	1	Glottic	1	Moderately Differentiated, Some keratinized	MDSK	2	Yes	1	No	2	-	2			2		2	2	2	2	2	2	2	-	2	-	2
191	M	1	64	1	Laryngectomy	2	Transglottic	4	Moderately Differentiated, Some keratinized	MDSK	2	Yes	1	No	2	+	1	11		2	-	2	2	2	2	2	2	2	-	2	-	2
192	M	1	46	2	Laryngectomy	2	Transglottic	4	Moderately Differentiated, Some keratinized	MDSK	2	Yes	1	No	2	-	2			2		2	2	2	2	2	2	2	-	2	-	2
193	M	1	75	1	Biopsy	1	Transglottic	4	Moderately Differentiated, Some keratinized	MDSK	2	Yes	1	No	2	-	2			2		2	2	2	2	2	2	2	-	2	-	2
194	M	1	67	1	Biopsy	1	Glottic	1	Moderately Differentiated, Some keratinized	MDSK	2	Yes	1	Yes	1	+	1	11		2	-	2	2	2	2	2	2	2	+	1	-	2
195	M	1	59	2	Biopsy	1	Glottic	1	Moderately Differentiated, Non- Keratinized	MDNK	3	Yes	1	No	2	+	1	16		2	+	1	2	1	2	2	2	2	-	2	-	2

## Sheet: Alphanumeric for SPSS
Patient No.	Sex	Age	+60 años	Surgical Sample	Anatomical Location	Histopathological SCC Grading	Smoking	Alcohol use	HPV Infection	Multiple HPV infection	HPV High Risk Detection	HR-HPV 52	HR-HPV 16	HR-HPV 31	HR-HPV 45	HR-HPV 26	HR-HPV 82	EBV Infection	MCPV Infection
1	1	89	1	2	1	1	1	1	2	2	2	2	2	2	2	2	2	1	2
2	1	61	1	1	1	2	1	2	2	2	2	2	2	2	2	2	2	2	2
3	1	74	1	1	3	2	1	2	2	2	2	2	2	2	2	2	2	2	2
4	1	81	1	1	1	2	1	2	2	2	2	2	2	2	2	2	2	1	2
5	1	61	1	2	2	2	1	1	2	2	2	2	2	2	2	2	2	2	1
6	1	45	2	1	1	2	1	2	2	2	2	2	2	2	2	2	2	2	2
7	1	61	1	2	2	2	1	1	1	1	1	1	2	2	2	2	2	2	2
8	1	75	1	1	1	2	1	2	1	2	1	1	2	2	2	2	2	2	2
9	1	53	2	2	4	2	1	2	1	2	1	2	1	2	2	2	2	2	2
10	1	61	1	1	1	2	1	2	1	2	1	1	2	2	2	2	2	2	2
11	1	56	2	2	4	2	1	2	2	2	2	2	2	2	2	2	2	2	2
12	1	66	1	1	1	2	1	2	2	2	2	2	2	2	2	2	2	1	2
13	1	61	1	1	3	2	1	2	1	2	1	1	2	2	2	2	2	2	2
14	1	51	2	1	1	5	1	2	2	2	2	2	2	2	2	2	2	2	2
15	1	63	1	1	1	2	1	2	1	2	1	2	1	2	2	2	2	2	1
16	1	58	2	1	1	2	1	2	2	2	2	2	2	2	2	2	2	1	2
17	2	60	1	1	1	1	1	2	2	2	2	2	2	2	2	2	2	2	2
18	1	40	2	2	4	2	1	2	2	2	2	2	2	2	2	2	2	1	2
19	1	60	1	2	4	2	1	2	2	2	2	2	2	2	2	2	2	2	2
20	1	85	1	1	3	2	1	2	2	2	2	2	2	2	2	2	2	1	2
21	1	61	1	2	4	2	1	2	2	2	2	2	2	2	2	2	2	1	2
22	1	66	1	1	1	2	1	2	2	2	2	2	2	2	2	2	2	2	2
23	1	61	1	1	3	3	1	2	2	2	2	2	2	2	2	2	2	1	2
24	1	65	1	1	1	5	1	2	2	2	2	2	2	2	2	2	2	2	2
25	1	63	1	1	1	2	1	2	2	2	2	2	2	2	2	2	2	2	2
26	1	56	2	2	4	2	1	2	2	2	2	2	2	2	2	2	2	2	2
27	1	82	1	1	1	5	1	2	2	2	2	2	2	2	2	2	2	2	2
28	1	71	1	2	4	2	1	2	1	1	1	1	2	2	2	2	2	2	2
29	1	68	1	1	3	2	1	2	1	1	1	2	1	2	2	2	2	2	2
30	1	78	1	1	1	2	1	2	2	2	2	2	2	2	2	2	2	2	2
31	1	65	1	1	1	2	1	2	2	2	2	2	2	2	2	2	2	2	2
32	1	69	1	1	1	2	1	2	1	2	1	2	2	2	1	2	2	2	1
33	1	87	1	1	1	2	1	2	2	2	2	2	2	2	2	2	2	2	2
34	1	71	1	1	1	2	1	2	2	2	2	2	2	2	2	2	2	2	2
35	1	61	1	2	2	2	1	1	2	2	2	2	2	2	2	2	2	2	2
36	2	64	1	1	1	2	1	2	2	2	2	2	2	2	2	2	2	2	2
37	1	60	1	2	4	2	1	2	2	2	2	2	2	2	2	2	2	2	2
38	1	60	1	2	4	2	1	2	2	2	2	2	2	2	2	2	2	1	2
39	1	76	1	1	1	5	1	2	2	2	2	2	2	2	2	2	2	2	2
40	1	76	1	1	3	2	1	2	2	2	2	2	2	2	2	2	2	2	2
41	1	60	1	2	4	2	1	2	2	2	2	2	2	2	2	2	2	1	2
42	1	79	1	1	3	2	1	2	1	2	2	2	2	2	2	2	2	2	2
43	1	70	1	1	1	2	1	2	2	2	2	2	2	2	2	2	2	2	2
44	1	56	2	2	4	2	1	1	2	2	2	2	2	2	2	2	2	2	2
45	1	81	1	1	1	2	1	2	1	1	1	1	2	2	2	2	2	2	1
46	1	67	1	1	1	2	1	2	1	1	1	2	1	2	2	2	2	2	2
47	1	71	1	2	4	2	1	2	1	1	1	1	2	2	2	2	2	2	2
48	1	80	1	1	3	2	1	2	1	1	2	2	2	2	2	2	2	2	2
49	1	63	1	2	4	2	1	2	1	1	1	1	2	2	2	2	2	2	2
50	1	68	1	2	1	2	2	1	1	1	1	1	2	2	1	2	2	2	2
51	1	83	1	1	3	2	1	2	1	1	1	1	2	2	2	2	2	2	2
52	1	66	1	1	1	2	1	2	1	1	1	1	1	2	2	2	2	2	2
53	1	60	1	2	4	2	1	2	1	1	1	1	2	2	2	2	2	2	2
54	1	67	1	1	1	5	1	2	1	2	1	2	2	2	1	2	2	2	2
55	1	69	1	1	1	2	1	2	1	1	1	1	2	2	2	2	2	2	2
56	1	60	1	2	1	2	1	2	1	1	1	2	2	2	1	2	2	2	2
57	2	72	1	1	1	5	1	2	1	1	1	1	2	2	2	2	2	1	2
58	1	72	1	2	1	2	1	2	1	1	1	1	2	2	2	2	2	2	2
59	1	51	2	2	4	2	1	2	1	2	1	1	2	2	2	2	2	1	2
60	1	61	1	1	1	2	1	2	1	1	1	1	2	2	2	2	2	2	2
61	1	78	1	1	1	2	1	1	1	1	1	2	1	2	2	2	2	2	2
62	1	61	1	2	4	2	1	2	1	1	1	1	2	2	2	2	2	2	2
63	1	56	2	2	2	2	1	2	1	1	1	1	2	1	2	2	2	1	2
64	1	62	1	1	1	2	1	2	1	1	1	1	2	2	2	2	2	2	2
65	1	79	1	1	1	2	1	2	1	1	1	1	2	2	2	2	2	1	2
66	1	84	1	2	1	2	1	2	1	1	1	1	2	2	2	2	2	2	2
67	1	55	2	1	1	2	1	2	1	1	1	1	2	2	2	2	2	1	2
68	1	65	1	2	4	2	1	1	1	1	1	1	1	2	2	2	2	1	2
69	1	58	2	2	4	2	1	2	1	1	1	1	2	2	2	2	2	2	2
70	1	72	1	2	4	2	2	2	1	1	1	1	2	2	2	2	2	1	2
71	1	74	1	2	4	2	1	2	1	1	1	1	2	1	2	2	2	2	2
72	1	71	1	2	4	2	1	2	1	1	1	1	2	2	2	2	2	2	2
73	1	67	1	2	1	2	1	2	1	2	1	1	2	2	2	2	2	2	2
74	1	72	1	2	3	2	1	2	1	1	1	1	2	1	2	2	2	1	2
75	1	84	1	2	1	2	1	2	1	1	1	1	2	1	2	1	2	1	2
76	1	64	1	2	1	2	1	2	1	2	2	2	2	2	2	2	2	1	2
77	1	44	2	2	4	2	1	2	1	2	2	2	2	2	2	2	2	2	2
78	1	62	1	1	3	2	1	2	1	2	2	2	2	2	2	2	2	1	2
79	1	70	1	1	1	3	1	2	1	1	1	1	2	1	2	2	2	2	2
80	1	49	2	1	1	5	1	2	1	1	1	1	2	2	2	2	2	2	2
81	1	72	1	2	1	2	1	2	1	1	1	1	2	1	2	2	2	2	2
82	1	40	2	2	4	2	1	2	2	2	2	2	2	2	2	2	2	1	2
83	1	68	1	2	3	2	1	2	2	2	2	2	2	2	2	2	2	2	2
84	1	56	2	1	1	2	1	2	1	1	1	1	1	2	2	2	2	2	2
85	1	79	1	1	3	2	1	2	1	1	1	1	2	2	2	2	2	2	2
86	1	63	1	1	1	2	1	2	1	1	1	1	2	2	2	2	2	2	2
87	1	65	1	2	1	2	1	2	1	1	2	2	2	2	2	2	2	1	2
88	1	68	1	2	4	2	1	2	1	1	1	1	2	2	2	2	2	1	2
89	1	60	1	1	1	2	1	2	1	1	1	1	2	2	2	2	2	2	2
90	1	62	1	2	4	2	1	2	1	1	1	1	2	1	2	2	2	1	2
91	1	75	1	1	1	2	1	2	1	1	1	1	2	2	2	2	2	2	2
92	1	76	1	2	4	2	1	2	1	1	1	1	2	1	2	2	2	2	2
93	2	72	1	1	1	5	1	2	2	2	2	2	2	2	2	2	2	2	2
94	1	73	1	2	4	2	1	2	2	2	2	2	2	2	2	2	2	1	2
95	1	78	1	1	1	5	1	2	2	2	2	2	2	2	2	2	2	2	2
96	1	71	1	1	1	5	1	2	2	2	2	2	2	2	2	2	2	1	2
97	1	49	2	2	1	2	1	2	1	2	1	1	2	2	2	2	2	2	2
98	1	49	2	2	1	2	1	2	1	2	2	2	2	2	2	2	2	2	2
99	1	67	1	1	3	2	1	2	1	2	1	1	2	2	2	2	2	2	2
100	1	81	1	1	3	2	1	2	2	2	2	2	2	2	2	2	2	1	2
101	1	71	1	2	4	2	1	2	2	2	2	2	2	2	2	2	2	2	2
102	1	63	1	1	3	5	1	2	1	1	1	1	2	1	2	2	2	2	2
103	1	78	1	1	1	2	1	2	2	2	2	2	2	2	2	2	2	2	2
104	1	49	2	2	1	2	1	2	2	2	2	2	2	2	2	2	2	2	2
105	1	77	1	1	1	2	1	2	2	2	2	2	2	2	2	2	2	2	2
106	1	67	1	1	1	2	1	2	2	2	2	2	2	2	2	2	2	2	2
107	1	76	1	1	1	2	2	2	2	2	2	2	2	2	2	2	2	2	2
108	1	75	1	1	1	2	1	2	2	2	2	2	2	2	2	2	2	2	2
109	1	54	2	1	1	5	1	2	2	2	2	2	2	2	2	2	2	1	2
110	1	62	1	1	1	6	1	2	2	2	2	2	2	2	2	2	2	2	2
111	1	59	2	1	1	2	1	2	2	2	2	2	2	2	2	2	2	2	2
112	1	49	2	2	1	2	1	2	2	2	2	2	2	2	2	2	2	1	2
113	1	76	1	1	1	2	1	2	1	2	1	1	2	2	2	2	2	2	2
114	1	71	1	1	1	2	1	2	1	2	1	1	2	2	2	2	2	2	2
115	1	56	2	1	1	4	1	2	2	2	2	2	2	2	2	2	2	1	2
116	2	61	1	1	1	2	1	2	1	2	2	2	2	2	2	2	2	2	2
117	1	70	1	1	1	2	1	2	2	2	2	2	2	2	2	2	2	2	2
118	1	49	2	1	1	5	1	2	2	2	2	2	2	2	2	2	2	2	2
119	1	49	2	1	4	2	1	2	1	2	1	2	2	2	1	2	2	1	2
120	1	77	1	1	1	2	1	2	1	2	1	2	2	2	1	2	2	1	2
121	1	78	1	1	1	2	1	2	2	2	2	2	2	2	2	2	2	2	2
122	1	63	1	1	1	2	1	2	2	2	2	2	2	2	2	2	2	2	2
123	1	75	1	1	1	2	2	2	2	2	2	2	2	2	2	2	2	2	2
124	2	75	1	1	1	2	1	2	1	2	1	2	2	2	1	2	2	2	2
125	1	49	2	2	4	5	1	2	1	2	2	2	2	2	2	2	2	1	2
126	1	58	2	1	1	2	1	2	2	2	2	2	2	2	2	2	2	2	2
127	1	54	2	1	1	5	1	2	2	2	2	2	2	2	2	2	2	2	2
128	1	68	1	1	1	5	1	2	2	2	2	2	2	2	2	2	2	2	2
129	1	49	2	2	1	2	1	2	2	2	2	2	2	2	2	2	2	2	2
130	1	49	2	2	4	5	1	2	1	2	2	2	2	2	2	2	2	2	2
131	2	66	1	1	1	2	1	2	2	2	2	2	2	2	2	2	2	2	2
132	1	74	1	1	1	2	1	2	2	2	2	2	2	2	2	2	2	2	2
133	1	63	1	1	1	5	1	2	1	2	1	2	2	2	1	2	2	2	2
134	1	71	1	2	4	2	1	2	2	2	2	2	2	2	2	2	2	1	2
135	2	64	1	1	1	2	1	2	2	2	2	2	2	2	2	2	2	1	2
136	1	59	2	1	3	4	1	2	2	2	2	2	2	2	2	2	2	1	2
137	1	53	2	1	1	2	1	2	2	2	2	2	2	2	2	2	2	1	1
138	1	67	1	1	3	2	1	2	2	2	2	2	2	2	2	2	2	2	1
139	1	69	1	1	1	2	1	1	1	2	1	1	2	2	2	2	2	1	2
140	1	62	1	1	1	2	1	2	2	2	2	2	2	2	2	2	2	1	2
141	1	58	2	1	1	2	1	2	1	2	1	1	2	2	2	2	2	2	1
142	1	74	1	1	1	2	1	2	2	2	2	2	2	2	2	2	2	1	2
143	1	45	2	1	1	2	1	2	2	2	2	2	2	2	2	2	2	1	1
144	1	65	1	1	1	5	1	2	1	1	1	1	2	1	2	2	2	2	2
145	1	67	1	1	1	2	1	2	2	2	2	2	2	2	2	2	2	2	1
146	1	43	2	1	1	2	1	2	2	2	2	2	2	2	2	2	2	1	2
147	1	67	1	1	1	2	1	2	2	2	2	2	2	2	2	2	2	2	1
148	1	62	1	1	1	2	1	2	1	2	1	1	2	2	2	2	2	1	2
149	1	75	1	1	1	2	2	2	1	2	1	2	2	2	1	2	2	1	1
150	1	67	1	1	1	2	1	2	2	2	2	2	2	2	2	2	2	2	2
151	1	71	1	1	1	2	1	2	2	2	2	2	2	2	2	2	2	2	2
152	1	52	2	1	1	2	1	2	1	2	2	2	2	2	2	2	2	2	2
153	1	76	1	1	4	2	1	2	2	2	2	2	2	2	2	2	2	2	2
154	2	66	1	1	4	2	1	2	2	2	2	2	2	2	2	2	2	2	2
155	1	67	1	1	1	2	1	2	2	2	2	2	2	2	2	2	2	2	2
156	1	66	1	1	3	5	1	1	1	2	2	2	2	2	2	2	2	1	2
157	1	66	1	1	1	2	1	2	1	2	2	2	2	2	2	2	2	2	2
158	1	49	2	2	1	2	1	2	2	2	2	2	2	2	2	2	2	2	2
159	1	67	1	1	1	2	1	2	2	2	2	2	2	2	2	2	2	1	2
160	1	80	1	1	1	2	2	2	1	2	2	2	2	2	2	2	2	2	2
161	1	67	1	1	1	2	1	2	2	2	2	2	2	2	2	2	2	2	2
162	1	67	1	2	4	2	1	2	2	2	2	2	2	2	2	2	2	2	2
163	1	60	1	1	1	2	1	2	2	2	2	2	2	2	2	2	2	2	2
164	1	59	2	1	1	2	1	2	2	2	2	2	2	2	2	2	2	2	2
165	1	67	1	1	3	2	1	2	1	2	2	2	2	2	2	2	2	2	2
166	1	74	1	1	1	2	1	2	2	2	2	2	2	2	2	2	2	2	2
167	1	55	2	1	3	2	1	2	2	2	2	2	2	2	2	2	2	1	2
168	2	54	2	1	1	2	1	2	1	2	2	2	2	2	2	2	2	2	2
169	1	49	2	2	4	5	1	2	1	2	2	2	2	2	2	2	2	1	2
170	1	64	1	1	1	2	2	2	2	2	2	2	2	2	2	2	2	2	2
171	1	76	1	1	3	2	1	2	1	2	2	2	2	2	2	2	2	2	2
172	1	87	1	1	3	2	1	2	2	2	2	2	2	2	2	2	2	2	2
173	1	71	1	2	4	2	1	2	1	2	2	2	2	2	2	2	2	1	2
174	1	79	1	1	4	2	1	2	2	2	2	2	2	2	2	2	2	1	2
175	1	45	2	2	4	2	1	2	2	2	2	2	2	2	2	2	2	2	2
176	1	64	1	1	1	5	1	2	2	2	2	2	2	2	2	2	2	2	2
177	1	70	1	2	1	2	1	2	1	2	2	2	2	2	2	2	2	2	2
178	1	58	2	2	2	2	1	2	1	2	2	2	2	2	2	2	2	2	2
179	1	71	1	1	1	2	1	2	2	2	2	2	2	2	2	2	2	2	2
180	1	54	2	1	1	2	1	2	1	1	1	2	1	2	2	2	2	2	2
181	1	65	1	2	1	2	1	1	1	2	2	2	2	2	2	2	2	1	2
182	1	57	2	1	1	2	1	2	2	2	2	2	2	2	2	2	2	2	2
183	1	66	1	1	1	2	1	2	1	2	2	2	2	2	2	2	2	2	2
184	1	64	1	1	1	2	1	2	1	1	1	2	1	2	2	2	1	2	2
185	1	67	1	1	3	2	1	2	1	2	2	2	2	2	2	2	2	2	2
186	1	35	2	1	1	2	1	2	2	2	2	2	2	2	2	2	2	2	2
187	1	56	2	2	2	2	1	2	2	2	2	2	2	2	2	2	2	2	2
188	1	73	1	2	4	5	1	2	2	2	2	2	2	2	2	2	2	1	2
189	1	71	1	1	1	2	1	2	2	2	2	2	2	2	2	2	2	2	2
190	1	61	1	1	1	2	1	2	2	2	2	2	2	2	2	2	2	2	2
191	1	64	1	2	4	2	1	2	1	2	2	2	2	2	2	2	2	2	2
192	1	46	2	2	4	2	1	2	2	2	2	2	2	2	2	2	2	2	2
193	1	75	1	1	4	2	1	2	2	2	2	2	2	2	2	2	2	2	2
194	1	67	1	1	1	2	1	1	1	2	2	2	2	2	2	2	2	1	2
195	1	59	2	1	1	3	1	2	1	2	1	2	1	2	2	2	2	2	2

## Sheet: Table 1
		Total	Human Papillomavirus				High-Risk Human Papillomavirus				Epstein-Barr virus				Merkel Cell Polyomavirus
			Positive	Negative			Positive	Negative			Positive	Negative			Positive	Negative
		(n=195)	(n = 93)	(n = 102)		p	(n=67)	(n=128)		p	(n = 54)	(n = 141)		p	(n = 11)	(n = 184)	p
Age (years)		66 (35-89)	66 (44-84)	65.5 (35-89)		0.554	67 (49-84)	65 (35-89)		0.185	64.5 (40-89)	66 (35-87)		0.41	67 (45-81)	66 (35-89)	0.798
≥60 years old		146 (74.9%)	73 (50.0%)	73 (50.0%)		0.322	55 (37.7%)	91 (62.3%)		0.064	37 (25.3%)	109 (74.7%)		0.268	8 (5.5%)	138 (94.5%)	1
Sex						0.75								0.729			1
	Male	185 (94.9%)	89 (48.1%)	96 (51.9%)			65 (35.1%)	120 (64.9%)			52 (28.1%)	133 (71.9%)			11 (5.9%)	174 (94.1%)
	Female	10 (5.1%)	4 (40.0%)	6 (60.0%)			2 (20.0%)	8 (80.0%)			2 (20.0%)	8 (80.0%)			-	10 (100%)
Surgical sample						0.016				0.204				0.026			0.074
	Biopsy	131 (67.2%)	55 (42.0%)	76 (58.0%)			41 (31.3%)	90 (68.7%)			30 (22.9%)	101 (77.1%)			10 (7.6%)	121 (92.4%)
	Laryngectomy	64 (32.8%)	38 (59.4%)	26 (40.6%)			26 (40.6%)	38 (59.4%)			24 (37.5%)	40 (62.5%)			1 (7.6%)	63 (98.4%)
Anatomical location						0.596				0.931				0.082			0.084
	Glottic	122 (62.6%)	54 (44.3%)	68 (55.7%)			42 (34.4%)	80 (65.6%)			27 (22.1%)	95 (77.9%)			9 (7.4%)	113 (92.6%)
	Subglottic	6 (3.1%)	3 (50.0%)	3 (50.0%)			2 (33.3%)	4 (66.7%)			1 (16.7%)	5 (83.3%)			1 (16.7%)	5 (83.3%)
	Supraglottic	24 (12.3%)	14 (58.3%)	10 (41.7%)			7 (29.2%)	17 (70.8%)			8 (33.3%)	16 (66.7%)			1 (4.2%)	23 (95.8%)
	Transglottic	43 (22.1%)	22 (51.2%)	21 (48.8%)			16 (37.2%)	27 (62.8%)			18 (41.9%)	25 (58.1%)			-	43 (100%)
Histopathological grading						0.201				0.267				0.217			0.559
	HDI	23 (11.8%)	10 (43.5%)	13 (56.5%)			6 (26.1%)	17 (73.9%)			7 (30.4%)	16 (69.6%)			-	23 (100%)
	MDSK	164 (84.1%)	81 (49.4%)	83 (50.6%)			59 (36.0%)	105 (73.9%)			43 (26.2%)	121 (73.8%)			11 (6.7%)	153 (93.3%)
	MDNK	3 (1.5%)	2 (66.7%)	1 (33.3%)			2 (66.7%)	1 (33.3%)			1 (33.3%)	2 (66.7%)			-	3 (100%)
	HDK	2 (1.0%)	-	2 (100%)			-	2 (100%)			2 (100%)	-			-	2 (100%)
	HGSP	1 (0.5%)	-	1 (100%)			-	1 (100%)			-	1 (100%)			-	1 (100%)
	PDNK	2 (1.0%)	-	2 (100%)			-	2 (100%)			1 (50.0%)	1 (50.0%)			-	2 (100%)
Smoking		188 (96.4%)	89 (47.3%)	99 (52.7%)		0.449	64 (34.0%)	124 (66.0%)		0.693	52 (27.7%)	136 (72.3%)		0.624	10 (5.3%)	178 (94.7%)	0.338
Alcohol use		12 (6.2%)	8 (66.7%)	4 (33.3%)		0.145	5 (41.7%)	7 (58.3%)		0.55	6 (50.0%)	6 (50.0%)		0.078	1 (5.3%)	11 (91.7%)	0.512

## Sheet: Table 2
	Patient No.	Sex	Age	Surgical Sample	Anatomical Location	Histopathological Grading	Smoking	Alcohol use	HR-HPV genotype	EBV	MCPV
	7	M	61	Laryngectomy	Subglottic	MDSK	Yes	Yes	11, 52	-	-
	8	M	75	Biopsy	Glottic	MDSK	Yes	No	52	-	-
	9	M	53	Laryngectomy	Transglottic	MDSK	Yes	No	16	-	-
	10	M	61	Biopsy	Glottic	MDSK	Yes	No	52	-	-
	13	M	61	Biopsy	Supraglottic	MDSK	Yes	No	52	-	-
	15	M	63	Biopsy	Glottic	MDSK	Yes	No	16	-	+
	28	M	71	Laryngectomy	Transglottic	MDSK	Yes	No	11, 52	-	-
	29	M	68	Biopsy	Supraglottic	MDSK	Yes	No	11, 16	-	-
	32	M	69	Biopsy	Glottic	MDSK	Yes	No	45	-	+
	45	M	81	Biopsy	Glottic	MDSK	Yes	No	11, 52	-	+
	46	M	67	Biopsy	Glottic	MDSK	Yes	No	11, 16	-	-
	47	M	71	Laryngectomy	Transglottic	MDSK	Yes	No	6, 11, 52	-	-
	49	M	63	Laryngectomy	Transglottic	MDSK	Yes	No	11, 52	-	-
	50	M	68	Laryngectomy	Glottic	MDSK	No	Yes	11, 45, 52	-	-
	51	M	83	Biopsy	Supraglottic	MDSK	Yes	No	6, 11, 52	-	-
	52	M	66	Biopsy	Glottic	MDSK	Yes	No	16, 52	-	-
	53	M	60	Laryngectomy	Transglottic	MDSK	Yes	No	11, 52	-	-
	54	M	67	Biopsy	Glottic	HDI	Yes	No	45	-	-
	55	M	69	Biopsy	Glottic	MDSK	Yes	No	6, 11, 52	-	-
	56	M	60	Laryngectomy	Glottic	MDSK	Yes	No	11, 45	-	-
	57	F	72	Biopsy	Glottic	HDI	Yes	No	11, 52	+	-
	58	M	72	Laryngectomy	Glottic	MDSK	Yes	No	11, 52	-	-
	59	M	51	Laryngectomy	Transglottic	MDSK	Yes	No	52	+	-
	60	M	61	Biopsy	Glottic	MDSK	Yes	No	11, 52	-	-
	61	M	78	Biopsy	Glottic	MDSK	Yes	Yes	11, 16	-	-
	62	M	61	Laryngectomy	Transglottic	MDSK	Yes	No	6, 11, 52	-	-
	63	M	56	Laryngectomy	Subglottic	MDSK	Yes	No	11, 31, 52, 54	+	-
	64	M	62	Biopsy	Glottic	MDSK	Yes	No	11, 52	-	-
	65	M	79	Biopsy	Glottic	MDSK	Yes	No	11, 52	+	-
	66	M	84	Laryngectomy	Glottic	MDSK	Yes	No	6, 11, 52	-	-
	67	M	55	Biopsy	Glottic	MDSK	Yes	No	6, 11, 52	+	-
	68	M	65	Laryngectomy	Transglottic	MDSK	Yes	Yes	11, 16, 52	+	-
	69	M	58	Laryngectomy	Transglottic	MDSK	Yes	No	11, 52	-	-
	70	M	72	Laryngectomy	Transglottic	MDSK	No	No	11, 52	+	-
	71	M	74	Laryngectomy	Transglottic	MDSK	Yes	No	11, 31, 52, 54	-	-
	72	M	71	Laryngectomy	Transglottic	MDSK	Yes	No	11, 52	-	-
	73	M	67	Laryngectomy	Glottic	MDSK	Yes	No	52	-	-
	74	M	72	Laryngectomy	Supraglottic	MDSK	Yes	No	11, 31, 52, 54	+	-
	75	M	84	Laryngectomy	Glottic	MDSK	Yes	No	11, 26, 31, 52, 54	+	-
	79	M	70	Biopsy	Glottic	MDNK	Yes	No	11, 31, 52, 54	-	-
	80	M	49	Biopsy	Glottic	HDI	Yes	No	11, 52	-	-
	81	M	72	Laryngectomy	Glottic	MDSK	Yes	No	11, 31, 52, 54	-	-
	84	M	56	Biopsy	Glottic	MDSK	Yes	No	6, 11, 16, 52	-	-
	85	M	79	Biopsy	Supraglottic	MDSK	Yes	No	11, 52	-	-
	86	M	63	Biopsy	Glottic	MDSK	Yes	No	11, 52	-	-
	88	M	68	Laryngectomy	Transglottic	MDSK	Yes	No	6, 11, 52	+	-
	89	M	60	Biopsy	Glottic	MDSK	Yes	No	11, 52	-	-
	90	M	62	Laryngectomy	Transglottic	MDSK	Yes	No	11, 31, 52	+	-
	91	M	75	Biopsy	Glottic	MDSK	Yes	No	11, 52	-	-
	92	M	76	Laryngectomy	Transglottic	MDSK	Yes	No	11, 31, 52	-	-
	97	M	49	Laryngectomy	Glottic	MDSK	Yes	No	52	-	-
	99	M	67	Biopsy	Supraglottic	MDSK	Yes	No	52	-	-
	102	M	63	Biopsy	Supraglottic	HDI	Yes	No	31, 52, 54	-	-
	113	M	76	Biopsy	Glottic	MDSK	Yes	No	52	-	-
	114	M	71	Biopsy	Glottic	MDSK	Yes	No	52	-	-
	119	M	49	Biopsy	Transglottic	MDSK	Yes	No	45	+	-
	120	M	77	Biopsy	Glottic	MDSK	Yes	No	45	+	-
	124	F	75	Biopsy	Glottic	MDSK	Yes	No	45	-	-
	133	M	63	Biopsy	Glottic	HDI	Yes	No	45	-	-
	139	M	69	Biopsy	Glottic	MDSK	Yes	Yes	52	+	-
	141	M	58	Biopsy	Glottic	MDSK	Yes	No	52	-	+
	144	M	65	Biopsy	Glottic	HDI	Yes	No	31, 52	-	-
	148	M	62	Biopsy	Glottic	MDSK	Yes	No	52	+	-
	149	M	75	Biopsy	Glottic	MDSK	No	No	45	+	+
	180	M	54	Biopsy	Glottic	MDSK	Yes	No	11, 16	-	-
	184	M	64	Biopsy	Glottic	MDSK	Yes	No	11, 16, 40, 82	-	-
	195	M	59	Biopsy	Glottic	MDNK	Yes	No	16	-	-

## Sheet: Table 3
	Patient No.	Sex	Age	Surgical Sample	Anatomical Location	Histopathological Grading	Smoking	Alcohol use	LR-HPV genotype	EBV	MCPV
	42	M	79	Biopsy	Supraglottic	MDSK	Yes	No	11	-	-
	48	M	80	Biopsy	Supraglottic	MDSK	Yes	No	6, 11	-	-
	76	M	64	Laryngectomy	Glottic	MDSK	Yes	No	11	+	-
	77	M	44	Laryngectomy	Transglottic	MDSK	Yes	No	11	-	-
	78	M	62	Biopsy	Supraglottic	MDSK	Yes	No	11	+	-
	87	M	65	Laryngectomy	Glottic	MDSK	Yes	No	6, 11	+	-
	98	M	49	Laryngectomy	Glottic	MDSK	Yes	No	11	-	-
	116	F	61	Biopsy	Glottic	MDSK	Yes	No	11	-	-
	125	M	49	Laryngectomy	Transglottic	HDI	Yes	No	11	+	-
	130	M	49	Laryngectomy	Transglottic	HDI	Yes	No	11	-	-
	152	M	52	Biopsy	Glottic	MDSK	Yes	No	11	-	-
	156	M	66	Biopsy	Supraglottic	HDI	Yes	Yes	11	+	-
	157	M	66	Biopsy	Glottic	MDSK	Yes	No	11	-	-
	160	M	80	Biopsy	Glottic	MDSK	No	No	11	-	-
	165	M	67	Biopsy	Supraglottic	MDSK	Yes	No	11	-	-
	168	F	54	Biopsy	Glottic	MDSK	Yes	No	11	-	-
	169	M	49	Laryngectomy	Transglottic	HDI	Yes	No	11	+	-
	171	M	76	Biopsy	Supraglottic	MDSK	Yes	No	11	-	-
	173	M	71	Laryngectomy	Transglottic	MDSK	Yes	No	11	+	-
	177	M	70	Laryngectomy	Glottic	MDSK	Yes	No	11	-	-
	178	M	58	Laryngectomy	Subglottic	MDSK	Yes	No	11	-	-
	181	M	65	Laryngectomy	Glottic	MDSK	Yes	Yes	11	+	-
	183	M	66	Biopsy	Glottic	MDSK	Yes	No	11	-	-
	185	M	67	Biopsy	Supraglottic	MDSK	Yes	No	11	-	-
	191	M	64	Laryngectomy	Transglottic	MDSK	Yes	No	11	-	-
	194	M	67	Biopsy	Glottic	MDSK	Yes	Yes	11	+	-
